# Supplementary material for: Plasma protein N-glycosylation is associated with cardiovascular disease, nephropathy, and retinopathy in type 2 diabetes
Source: PubMed Central journal article supplement (PMC8515459; doi:10.1136/bmjdrc-2021-002345), 2021-10-13
Supplement: bmjdrc-2021-002345supp002.pdf [file bmjdrc-2021-002345supp002.pdf]

The following material is supplementary to the manuscript:

**Plasma protein N-glycosylation is associated with cardiovascular disease, nephropathy, and retinopathy in type 2 diabetes.**

Elham Memarian <sup>a,b,\*</sup>, Leen M 't Hart <sup>c,d,e,\*</sup>, Roderick C. Sliker <sup>c,d</sup>, Roosmarijn F.L. Lemmers <sup>f</sup>, Amber A van der Heijden <sup>g</sup>, Femke Rutters <sup>h</sup>, Giel Nijpels <sup>g</sup>, Emma Schoep <sup>c</sup>, Aloysius G. Lieverse <sup>i</sup>, Eric J.G. Sijbrands <sup>f</sup>, Manfred Wuhrer <sup>a</sup>, Mandy van Hoek <sup>f\*\*,#</sup>, Viktoria Dotz <sup>a\*\*,#</sup>

<sup>a</sup> Center for Proteomics and Metabolomics, Leiden University Medical Center, the Netherlands

<sup>b</sup> Genos Glycoscience Research Laboratory, Zagreb, Croatia

<sup>c</sup> Department of Cell and Chemical Biology, Leiden University Medical Center, the Netherlands

<sup>d</sup> Department of Epidemiology and Biostatistics, Amsterdam University Medical Center, location VUMC, Amsterdam, The Netherlands

<sup>e</sup> Department of Biomedical Data Sciences, Section Molecular Epidemiology, Leiden University Medical Center, the Netherlands

<sup>f</sup> Department of Internal Medicine, Erasmus MC, University Medical Center, Rotterdam, the Netherlands

<sup>g</sup> Amsterdam UMC, Vrije Universiteit Amsterdam, Department of General Practice Medicine, Amsterdam Public Health Research Institute, Amsterdam, the Netherlands

<sup>h</sup> Amsterdam UMC, Vrije Universiteit Amsterdam, Department of Epidemiology and Data Science, Amsterdam Public Health Research Institute, Amsterdam, the Netherlands

<sup>i</sup> Department of Internal Medicine, Maxima Medical Center, Eindhoven, the Netherlands

\*These authors contributed equally

\*\*These authors contributed equally

# Current address: BioTherapeutics Analytical Development, Janssen Biologics BV, Einsteinweg 101, 2333 CB Leiden, The Netherlands

Corresponding author:

Mandy van Hoek, ORCIDID: 0000-0002-2957-5436, Department of Internal Medicine, Erasmus MC – University Medical Center Rotterdam, Doctor Molewaterplein 40, 3015 GD, Rotterdam, The Netherlands, m.vanhoek@erasmusmc.nl, Tel.: +31 633343603

**Supplementary Table 1. DiaGene cohort characteristics.** Details on the cohorts including definitions and biochemical measurements have been described elsewhere. [15,16]

|                                                 | DiaGene Study-<br>All | DiaGene Study<br>prevalent CVD | DiaGene Study<br>incident CVD | DiaGene Study<br>prevalent<br>Nephropathy | DiaGene Study<br>incident<br>Nephropathy | DiaGene Study<br>prevalent<br>Retinopathy | DiaGene Study<br>incident<br>Retinopathy |
|-------------------------------------------------|-----------------------|--------------------------------|-------------------------------|-------------------------------------------|------------------------------------------|-------------------------------------------|------------------------------------------|
| Number of participants                          | 1815                  | 628                            | 104                           | 367                                       | 244                                      | 291                                       | 219                                      |
| Age, yr, mean (±sd)                             | 65.2 (10.6)           | 68.6 (9.2)                     | 65.2 (9.4)                    | 65.8 (10.14)                              | 68.56 (9.58)                             | 67.61 (9.68)                              | 64.28 (10.80)                            |
| Female sex, % (n)                               | 46.3 (841)            | 36.8 (231)                     | 43 (45)                       | 31.1 (114)                                | 42.6 (104)                               | 38.5 (112)                                | 45.7 (100)                               |
| Age of onset diabetes, yr, mean (±sd)           | 54.9 (11.7)           | 57.2 (11.3)                    | 52.8 (9.9)                    | 54.0 (11.4)                               | 58.24 (10.99)                            | 50.2 (10.3)                               | 51.00 (11.79)                            |
| Duration of diabetes, yr, median (IQR)          | 7.99 (2.47-14.13)     | 9.53 (4.02-16.65)              | 10.05 (5.46-16.72)            | 11.70 (6.61-18.27)                        | 8.46 (4.12-15.43)                        | 16.71 (10.87-23.05)                       | 11.61 (7.09-17.26)                       |
| BMI, kg/m <sup>2</sup> , mean (±sd)             | 29.5 (5.5)            | 30.36 (4.90)                   | 29.88 (4.82)                  | 31.38 (5.78)                              | 30.49 (5.59)                             | 31.04 (5.79)                              | 31.37 (5.63)                             |
| Total Cholesterol, mmol/L, mean (±sd)           | 4.29 (0.93)           | 4.15 (0.86)                    | 4.47 (0.91)                   | 4.14 (0.91)                               | 4.24 (0.99)                              | 4.16 (0.87)                               | 4.11 (0.86)                              |
| Triglycerides, mmol/L, median (IQR)             | 1.42 (1.02-2.03)      | 1.45 (1.02-2.07)               | 1.40 (1.02-2.20)              | 1.54 (1.10-2.23)                          | 1.52 (1.10-2.27)                         | 1.39 (0.97-1.87)                          | 1.44 (1.01-2.03)                         |
| HDL-c, mmol/L, mean (±sd)                       | 1.17 (0.32)           | 1.12 (0.31)                    | 1.23 (0.34)                   | 1.12 (0.31)                               | 1.14 (0.29)                              | 1.20 (0.35)                               | 1.17 (0.35)                              |
| LDL-c, mmol/L, mean (±sd)                       | 2.45 (0.82)           | 2.34 (0.74)                    | 2.56 (0.90)                   | 2.24 (0.76)                               | 2.40 (0.89)                              | 2.26 (0.74)                               | 2.25 (0.74)                              |
| Non-HDL-c, mmol/L, mean (±sd)                   | 3.12 (0.90)           | 3.01 (0.84)                    | 3.25 (0.94)                   | 3.02 (0.88)                               | 3.10 (0.99)                              | 2.95 (0.84)                               | 2.93 (0.82)                              |
| Creatinine, μmol/L, mean (±sd)                  | 83.44 (28.65)         | 90.83 (33.78)                  | 80.79 (30.23)                 | 98.06 (40.80)                             | 87.52 (29.88)                            | 91.30 (32.68)                             | 81.00 (26.37)                            |
| HbA1c, % (sd)                                   | 7.03 (1.06)           | 7.02 (1.00)                    | 7.30 (1.15)                   | 7.26 (1.17)                               | 7.06 (1.09)                              | 7.54 (1.09)                               | 7.53 (1.31)                              |
| HbA1c, mmol/mol, mean (±sd)                     | 53.31 (11.58)         | 53.24 (10.88)                  | 56.33 (12.56)                 | 55.89 (12.75)                             | 53.70 (11.94)                            | 58.91 (11.89)                             | 58.80 (14.27)                            |
| Systolic blood pressure, mmHg, mean (±sd)       | 141.93 (18.79)        | 142.36 (19.72)                 | 139.88 (16.58)                | 142.63 (19.73)                            | 144.53 (18.19)                           | 139.41 (19.31)                            | 140.95 (17.38)                           |
| Diastolic blood pressure, mmHg, mean (±sd)      | 77.38 (9.87)          | 75.73 (10.18)                  | 76.76 (9.58)                  | 76.03 (9.79)                              | 77.56 (9.43)                             | 74.89 (9.18)                              | 77.44 (10.34)                            |
| Smoking, no/former/yes, %                       | 23.4/ 50.9/ 16.2      | 17.7/ 59.6/ 16.4               | 24.0/ 50.0/ 19.2              | 17.2/ 57.2/ 16.9                          | 17.6/ 55.7/ 16.4                         | 26.5/ 49.1/ 13.4                          | 25.1/ 48.9/ 16.0                         |
| Insulin use, % (n)                              | 29.8 (541)            | 33 (207)                       | 34.6 (36)                     | 39.5 (145)                                | 27.9 (68)                                | 55.7 (162)                                | 50.7 (111)                               |
| Oral glucose-lowering medication, % (n)         | 61.1 (1109)           | 61.1 (384)                     | 53.8 (56)                     | 63.5 (233)                                | 66.0 (161)                               | 48.5 (141)                                | 62.6 (137)                               |
| High-osmolar diuretics, % (n)                   | 6.9 (125)             | 11.6 (73)                      | 6.7 (7)                       | 11.2 (41)                                 | 8.6 (21)                                 | 10.3 (30)                                 | 5.5 (12)                                 |
| Lipid modifying agents, % (n)                   | 65.8 (1194)           | 75.0 (471)                     | 67.3 (70)                     | 67.6 (248)                                | 73.8 (180)                               | 62.9 (183)                                | 69.9 (153)                               |
| Renin-angiotensin system (RAS)-inhibitor, % (n) | 53.3 (968)            | 65.4 (411)                     | 51.0 (53)                     | 71.7 (263)                                | 61.9 (151)                               | 60.1 (175)                                | 54.8 (120)                               |
| Other antihypertensive medication, % (n)        | 13.3 (242)            | 14.5 (91)                      | 11.5 (12)                     | 8.7 (32)                                  | 13.1 (32)                                | 8.6 (25)                                  | 12.3 (27)                                |
| Anticoagulant medication, % (n)                 | 40 (726)              | 73.4 (461)                     | 28.8 (30)                     | 55 (202)                                  | 48.8 (119)                               | 48.8 (142)                                | 44.3 (97)                                |
| Biguanides, % (n)                               | 51.1 (927)            | 51.1 (321)                     | 43.3 (45)                     | 54 (198)                                  | 57.0 (139)                               | 42.6 (124)                                | 56.6 (124)                               |
| incident CVD, % (n-case/n-total)                | 10.1 (104/1034)       | 31.1 (195)                     |                               | 25.1 (92)                                 |                                          | 29.6 (86)                                 |                                          |
| prevalent CVD, % (n-case/n-total)               | 34.6 (628/1669)       | 100 (628)                      |                               | 46.3 (170)                                |                                          | 41.9 (122)                                |                                          |
| incident Nephropathy, % (n-case/n-total)        | 20.1 (244/1214)       | 47.0 (295)                     |                               | 94.3 (346)                                |                                          | 57.7 (168)                                |                                          |
| prevalent Nephropathy, % (n-case/n-total)       | 20.2 (367/1621)       | 27.1 (170)                     |                               | 100 (367)                                 |                                          | 44.3 (129)                                |                                          |
| incident Retinopathy, % (n-case/n-total)        | 16.1 (219/1361)       | 26.9 (169)                     |                               | 39.0 (143)                                |                                          | 75.6 (220)                                |                                          |
| prevalent Retinopathy, % (n-case/n-total)       | 16.0 (291/1714)       | 19.4 (122)                     |                               | 35.1 (129)                                |                                          | 100 (291)                                 |                                          |

**Supplementary Table 2. Hoorn DCS cohort characteristics.** Details on the cohorts including definitions and biochemical measurements have been described elsewhere. [15,16]

|                                                | Hoorn DCS study-All | Hoorn DCS study prevalent CVD | Hoorn DCS study incident CVD | Hoorn DCS study prevalent Nephropathy | Hoorn DCS study incident Nephropathy | Hoorn DCS study prevalent Retinopathy | Hoorn DCS study incident Retinopathy |
|------------------------------------------------|---------------------|-------------------------------|------------------------------|---------------------------------------|--------------------------------------|---------------------------------------|--------------------------------------|
| Number of participants                         | 1518                | 288                           | 97                           | 236                                   | 158                                  | 214                                   | 126                                  |
| Age, yr, mean (±sd)                            | 64.5 (10.6)         | 69.0 (9.0)                    | 67.1 (9.2)                   | 66.0 (11.1)                           | 66.2 (10.5)                          | 66.5 (10.8)                           | 64.4 (10.9)                          |
| Female sex, %(n)                               | 43.74 (664)         | 28.12 (81)                    | 43.30 (42)                   | 27.97 (66)                            | 31.65 (50)                           | 41.12 (88)                            | 43.65 (55)                           |
| Age of onset diabetes, yr, mean (±sd)          | 57.3 (11.0)         | 61.0 (9.9)                    | 59.9 (10.9)                  | 56.6 (11.6)                           | 58.8 (11.6)                          | 55.6 (11.9)                           | 55.8 (10.5)                          |
| Duration of diabetes, yr, median (IQR)         | 6.0 (2.9-9.9)       | 7.0 (3.2-10.9)                | 5.6 (2.3-10.5)               | 8.3 (5.0-12.4)                        | 6.0 (2.6-10.0)                       | 9.8 (6.4-14.3)                        | 6.9 (3.0-12.0)                       |
| BMI, kg/m <sup>2</sup> , mean (±sd)            | 30.4 (5.4)          | 29.9 (5.1)                    | 29.9 (4.7)                   | 31.1 (6.1)                            | 30.5 (5.3)                           | 30.2 (5.7)                            | 30.9 (5.3)                           |
| Total Cholesterol, mmol/L, mean (±sd)          | 4.63 (1.65)         | 4.35 (0.89)                   | 4.78 (0.88)                  | 4.53 (0.99)                           | 4.48 (1.01)                          | 4.61 (1.04)                           | 4.59 (0.99)                          |
| Triglycerides, mmol/L, median (IQR)            | 1.58 (1.15-2.19)    | 1.63 (1.20-2.22)              | 1.56 (1.13-2.24)             | 1.75 (1.20-2.37)                      | 1.70 (1.27-2.18)                     | 1.59 (1.15-2.13)                      | 1.69 (1.25-2.56)                     |
| HDL-c, mmol/L, mean (±sd)                      | 1.18 (0.39)         | 1.13 (0.31)                   | 1.21 (0.37)                  | 1.10 (0.29)                           | 1.12 (0.31)                          | 1.17 (0.33)                           | 1.14 (0.33)                          |
| LDL-c, mmol/L, mean (±sd)                      | 2.63 (0.89)         | 2.41 (0.75)                   | 2.75 (0.75)                  | 2.59 (0.83)                           | 2.51 (0.87)                          | 2.64 (0.89)                           | 2.54 (0.79)                          |
| Non-HDL-c, mmol/L, mean (±sd)                  | 3.46 (1.48)         | 3.22 (0.85)                   | 3.58 (0.87)                  | 3.43 (1.01)                           | 3.36 (0.99)                          | 3.44 (1.03)                           | 3.45 (0.95)                          |
| Creatinine, µmol/L, mean (±sd)                 | 79.78 (22.24)       | 87.30 (23.94)                 | 81.23 (18.27)                | 87.05 (33.29)                         | 85.91 (22.15)                        | 80.71 (19.29)                         | 80.99 (33.95)                        |
| HbA1c, % (±sd)                                 | 6.8 (1.0)           | 6.9 (1.1)                     | 6.8 (1.1)                    | 7.1 (1.2)                             | 6.9 (1.1)                            | 7.1 (1.2)                             | 7.4 (1.4)                            |
| HbA1c, mmol/mol, mean (±sd)                    | 51 (11)             | 52 (12)                       | 51 (12)                      | 54 (13)                               | 52 (12)                              | 54 (12)                               | 57 (15)                              |
| Systolic blood pressure, mmHg, mean (±sd)      | 144 (19)            | 145(20)                       | 150 (20)                     | 148 (21)                              | 148 (20)                             | 148(19)                               | 148 (20)                             |
| Diastolic blood pressure, mmHg, mean (±sd)     | 76 (10)             | 74 (10)                       | 77 (10)                      | 77 (10)                               | 77 (10)                              | 77 (10)                               | 77 (9)                               |
| Smoking, no/former/yes, %                      | 61/ 22/ 17          | 57/ 28/ 15                    | 54/ 26/ 21                   | 52/ 21/ 27                            | 58/ 29/ 13                           | 65/ 19/ 16                            | 62/ 24/ 14                           |
| Insulin use, %(n)                              | 25.2 (382)          | 29.2 (84)                     | 22.7 (22)                    | 36.4 (86)                             | 27.2 (43)                            | 40.2 (86)                             | 37.3 (47)                            |
| Oral glucose-lowering medication, %(n)         | 73.1 (1110)         | 72.6 (209)                    | 76.3 (74)                    | 75.8 (179)                            | 81.0 (128)                           | 73.4 (157)                            | 82.5 (104)                           |
| High-ceiling diuretics, %(n)                   | 7.9 (120)           | 13.5 (39)                     | 7.2 (7)                      | 15.7 (37)                             | 5.7 (9)                              | 11.2 (24)                             | 7.1 (9)                              |
| Lipid modifying agents, %(n)                   | 70.2 (1066)         | 87.8 (253)                    | 62.9 (61)                    | 72.9 (172)                            | 75.9 (120)                           | 73.4 (157)                            | 65.1 (82)                            |
| Renin-angiotensin system (RAS)-inhibitor, %(n) | 39.5 (599)          | 50.7 (146)                    | 43.3 (42)                    | 52.5 (124)                            | 37.3 (59)                            | 43.5 (93)                             | 38.1 (48)                            |
| Other antihypertensive medication, %(n)        | 21.3 (323)          | 33.3 (96)                     | 24.7 (24)                    | 35.2 (83)                             | 25.3 (40)                            | 25.2 (54)                             | 20.6 (26)                            |
| Anticoagulant medication, %(n)                 | 3.1 (47)            | 9.4 (27)                      | 1.0 (1)                      | 4.2 (10)                              | 1.9 (3)                              | 3.7 (8)                               | 2.4 (3)                              |
| Biguanides, %(n)                               | 67.5 (1024)         | 68.1 (196)                    | 68.0 (66)                    | 69.9 (165)                            | 76.6 (121)                           | 65.9 (141)                            | 79.4 (100)                           |
| incident CVD, % (n-case/n-total)               | 8.0 (97/1220)       |                               |                              |                                       |                                      |                                       |                                      |
| prevalent CVD, % (n-case/n-total)              | 19.0 (288/1518)     |                               |                              |                                       |                                      |                                       |                                      |
| incident Nephropathy, % (n-case/n-total)       | 12.4 (158/1272)     |                               |                              |                                       |                                      |                                       |                                      |
| prevalent Nephropathy, % (n-case/n-total)      | 15.5 (236/1518)     |                               |                              |                                       |                                      |                                       |                                      |
| incident Retinopathy, % (n-case/n-total)       | 9.9 (126/1278)      |                               |                              |                                       |                                      |                                       |                                      |
| prevalent Retinopathy, % (n-case/n-total)      | 14.2 (214/1503)     |                               |                              |                                       |                                      |                                       |                                      |

**Supplementary Table 3. Derived trait description, depiction, and calculation.** Within the depictions, divisions have been indicated by braces, exclusions by a cross, whereas numerical values indicate compositional limitations (i.e. 5-9 as the possible number of mannoses, 1-4 N-acetylhexosamines, or 2 fucoses). Trait abbreviations: M = mannose; Hy = hybrid species; T = within total; C = within complex species; F = deoxyhexose (fucose); G = galactose; S = N-acetylneuraminic acid (sialic acid); E = α2,6-linked sialic acid; L = α2,3-linked sialic acid; H = hexose (mannose or galactose); N = N-acetylhexosamine (N-acetylglucosamine: GlcNAc).

| Derived trait       | Description                                                                                                        | Depiction | Calculation                                                                                                                                                                                                                                                                                                                                                                              | Relative intensity VisuCon standard plasma_DiaGene (N=149) |           |        | Relative intensity VisuCon standard plasma_Hoorn DCS (N=78) |          |        |
|---------------------|--------------------------------------------------------------------------------------------------------------------|-----------|------------------------------------------------------------------------------------------------------------------------------------------------------------------------------------------------------------------------------------------------------------------------------------------------------------------------------------------------------------------------------------------|------------------------------------------------------------|-----------|--------|-------------------------------------------------------------|----------|--------|
|                     |                                                                                                                    |           |                                                                                                                                                                                                                                                                                                                                                                                          | mean                                                       | SD        | RSD    | mean                                                        | SD       | RSD    |
| <b>Complexity</b>   |                                                                                                                    |           |                                                                                                                                                                                                                                                                                                                                                                                          |                                                            |           |        |                                                             |          |        |
| MM                  | Average number of mannoses on high mannose type glycans                                                            |           | $MM = (5 * (HSN2) + 6 * (H6N2) + 7 * (H7N2) + 8 * (HSN2) + 9 * (H9N2) + 10 * (0)) / ((HSN2 + H6N2 + H7N2 + H8N2 + H9N2))$                                                                                                                                                                                                                                                                | 7.8250                                                     | 0.1272234 | 1.63%  | 7.587083                                                    | 0.08479  | 1.12%  |
| MHy                 | The ratio of high-mannose to hybrid glycans                                                                        |           | $MHy = ((HSN2 + H6N2 + H7N2 + H8N2 + H9N2)) / ((HSN3 + H6N3 + H5N3E1 + H6N3E1))$                                                                                                                                                                                                                                                                                                         | 3.3010                                                     | 0.8767    | 26.56% | 2.389037                                                    | 0.334529 | 14.00% |
| CA2                 | Relative abundance of diantennary glycans within complex type glycans                                              |           | $CA2 = ((HSN4F1 + H4N4 + H3N5 + H4N4F1 + H5N4 + H3NSF1 + H4N5 + H5N4F1 + H4N4E1 + H4NSF1 + H5N5 + H5N4L1 + H4N4F1E1 + H5N4E1 + H5NSF1 + H4NSE1 + H5N4F1L1 + H4NSF1E1 + H4NSE1E1 + H5N4F1L2 + H4NSF1E2 + H5NSF1E1L1 + H5NSF1E2L1) / ((HSN3E1 + H4N4 + H3N5 + H4NSF1E1 + H4NSE1E1 + H5N4F1L1 + H4NSF1E1L1 + H4NSE1E1L1 + H4NSF1E1L2 + H4NSF1E2L1 + H5NSF1E1L2 + H5NSF1E2L2))$              | 0.8195                                                     | 0.0243    | 2.96%  | 0.774313                                                    | 0.020593 | 2.66%  |
| CA3                 | Relative abundance of triantennary glycans within complex type glycans                                             |           | $CA3 = ((H6NSE1 + H6NSF1E1 + H6NSL2 + H6NSE1L1 + H6NSE2 + H6NSF1L2 + H6NSF1E1L1 + H6NSF1E2 + H6NSE1L2 + H6NSE3 + H6NSF1E1L2 + H6NSF1E2L2) / ((HSN3E1 + H4N4 + H3N5 + H4NSF1E1 + H4NSE1E1 + H5N4F1L1 + H4NSF1E1L1 + H4NSE1E1L1 + H5NSF1E1L1 + H5NSF1E2L1 + H5NSF1E1L2 + H5NSF1E2L2))$                                                                                                     | 0.1616                                                     | 0.0213    | 13.16% | 0.178731                                                    | 0.014994 | 8.39%  |
| TA2FS0              | Fucosylated, non-sialylated diantennary species within total glycans. Mostly derived from IgG (Clere et al. 2015). |           | $TA2FS0 = ((H3N4F1 + H4N4F1 + H3NSF1 + H5N4F1 + H4NSF1 + H5NSF1))$                                                                                                                                                                                                                                                                                                                       | 0.0466                                                     | 0.0101    | 21.74% | 0.063788                                                    | 0.007242 | 11.35% |
| <b>Fucosylation</b> |                                                                                                                    |           |                                                                                                                                                                                                                                                                                                                                                                                          |                                                            |           |        |                                                             |          |        |
| A2F                 | Fucosylation within diantennary glycans                                                                            |           | $A2F = ((H3N4F1 + H4N4F1 + H3NSF1 + H5N4F1 + H4NSF1 + H5NSF1 + H4N4F1E1 + H5NSF1E1 + H4NSF1L1 + H5NSF1E1L1 + H4NSF1E1L2 + H5NSF1E1L2 + H4NSF1E2L1 + H5NSF1E2L2) / ((H3N4F1 + H4N4 + H3N5 + H4N4F1 + H5N4 + H3NSF1 + H4N5 + H5N4F1 + H4N4E1 + H4NSF1 + H5N5 + H5N4L1 + H4N4F1E1 + H5N4E1 + H3NSF1 + H4NSE1 + H5N4F1L1 + H4NSF1E1L1 + H4NSF1E1L2 + H5NSF1E1L2 + H4NSF1E2L1 + H5NSF1E2L2))$ | 0.1925                                                     | 0.0201    | 10.46% | 0.205014                                                    | 0.015817 | 7.72%  |
| A4F                 | Fucosylation within tetra-antennary glycans                                                                        |           | $A4F = ((H7N6F1E1L2 + H7N6F1E2L1 + H7N6F1E1L3 + H7N6F1E2L2 + H7N6F1E3L1 + H7N6F1E2L2) / ((H7N6F1E1L2 + H7N6F1E2L1 + H7N6F1E1L3 + H7N6F1E2L2 + H7N6F1E3L1 + H7N6F1E2L2))$                                                                                                                                                                                                                 | 0.3396                                                     | 0.0286    | 8.42%  | 0.40244                                                     | 0.02777  | 6.90%  |
| A2S0F               | Fucosylation within non-sialylated diantennary glycans                                                             |           | $A2S0F = ((H3N4F1 + H4N4F1 + H3NSF1 + H5N4F1 + H4NSF1 + H5NSF1) / ((H3N4F1 + H4N4 + H3N5 + H4N4F1 + H5N4 + H3NSF1 + H4N5 + H5N4F1 + H4NSF1 + H5NSF1))$                                                                                                                                                                                                                                   | 0.9334                                                     | 0.0131    | 1.41%  | 0.929363                                                    | 0.006989 | 0.75%  |
| A2EF                | Fucosylation within diantennary glycans with α2,6-linked sialic acid                                               |           | $A2EF = ((H4N4F1E1 + H3N4F1E1 + H4NSF1E1 + H5NSF1E1 + H5N4F1E1L1 + H5N4F1E2 + H5NSF1E1L1 + H5NSF1E2) / ((H4N4E1 + H4N4F1E1 + H5N4E1 + H4NSE1 + H5N4F1E1L1 + H4NSF1E1L1 + H5NSF1E1L1 + H5NSF1E2L1 + H4NSF1E2L1 + H5NSF1E1L2 + H5NSF1E2L2))$                                                                                                                                               | 0.1302                                                     | 0.0121    | 9.30%  | 0.122182                                                    | 0.00967  | 7.91%  |
| A2E0F               | Fucosylation within diantennary glycans without α2,6-linked sialic acid                                            |           | $A2E0F = ((H3N4F1 + H4N4F1 + H3NSF1 + H5N4F1 + H4NSF1 + H5NSF1 + H5N4F1L1 + H4NSF1L2) / ((H3N4F1 + H4N4 + H3N5 + H4N4F1 + H5N4 + H3NSF1 + H4N5 + H5N4F1 + H4NSF1 + H5NSF1 + H5N4L1 + H4N4F1E1 + H5N4E1L1 + H5NSF1E1L1 + H5NSF1E2L1 + H4NSF1E2L1 + H5NSF1E1L2 + H5NSF1E2L2))$                                                                                                             | 0.8873                                                     | 0.0136    | 1.53%  | 0.92288                                                     | 0.006074 | 0.66%  |
| A2LF                | Fucosylation within diantennary glycans with α2,3-linked sialic acid                                               |           | $A2LF = ((H5N4F1L1 + H5N4F1L2 + H5N4F1E1L1 + H5NSF1E1L1) / ((H5N4L1 + H5N4F1L1 + H5N4L2 + H5N4E1L1 + H5N4F1L2 + H5N4F1E1L1 + H5NSF1E1L1))$                                                                                                                                                                                                                                               | 0.3133                                                     | 0.0173    | 5.51%  | 0.379772                                                    | 0.013449 | 3.54%  |
| A2L0F               | Fucosylation within diantennary glycans without α2,3-linked sialic acid                                            |           | $A2L0F = ((H3N4F1 + H4N4F1 + H3NSF1 + H5N4F1 + H4NSF1 + H5NSF1 + H4N4F1E1 + H5NSF1E1 + H4NSF1L1 + H5NSF1E1L1 + H4NSF1E1L2 + H5NSF1E1L2) / ((H3N4F1 + H4N4 + H3N5 + H4N4F1 + H5N4 + H3NSF1 + H4N5 + H5N4F1 + H4N4E1 + H4NSF1 + H5N5 + H5N4L1 + H4N4F1E1 + H5N4E1 + H3NSF1 + H4NSE1 + H5N4F1L1 + H4NSF1E1L1 + H4NSF1E1L2 + H5NSF1E1L2 + H4NSF1E2L1 + H5NSF1E2L2))$                         | 0.1788                                                     | 0.0212    | 11.83% | 0.192445                                                    | 0.016243 | 8.44%  |
| A3F                 | Fucosylation within triantennary glycans                                                                           |           | $A3F = ((H6NSF1E1 + H6NSF1L2 + H6NSF1E1L1 + H6NSF1E2 + H6NSF1E1L2 + H6NSF1E2L1 + H6NSF1E1L3 + H6NSF1E2L2) / ((H6NSE1 + H6NSF1E1 + H6NSL2 + H6NSE1L1 + H6NSE2 + H6NSF1L2 + H6NSF1E1L1 + H6NSF1E2 + H6NSE1L2 + H6NSE3 + H6NSF1E1L2 + H6NSF1E2L1 + H6NSF1E1L3 + H6NSF1E2L2))$                                                                                                               | 0.3593                                                     | 0.0265    | 7.36%  | 0.355372                                                    | 0.016304 | 4.59%  |
| A3LF                | Fucosylation within triantennary glycans with α2,3-linked sialic acid                                              |           | $A3LF = ((H6NSF1L2 + H6NSF1E1L1 + H6NSF1E1L2 + H6NSF1E2L1 + H6NSF1E1L3 + H6NSF1E2L2) / ((H6NSL2 + H6NSE1L1 + H6NSF1L2 + H6NSF1E1L1 + H6NSE1L2 + H6NSE2L1 + H6NSF1E1L2 + H6NSF1E2L1))$                                                                                                                                                                                                    | 0.4326                                                     | 0.0334    | 7.71%  | 0.428352                                                    | 0.021633 | 5.05%  |
| A3L0F               | Fucosylation within triantennary glycans without α2,3-linked sialic acid                                           |           | $A3L0F = ((H6NSF1E1 + H6NSF1E2 + H6NSF1E3) / ((H6NSE1 + H6NSF1E1 + H6NSE2 + H6NSF1E2 + H6NSE3 + H6NSF1E3))$                                                                                                                                                                                                                                                                              | 0.1487                                                     | 0.0173    | 11.65% | 0.149752                                                    | 0.01356  | 9.05%  |

| Bisecton                    |                                                                                                                 |  |                                                                                                                                                                                                                                                                                                                                                                                                                 |        |        |        |                          |
|-----------------------------|-----------------------------------------------------------------------------------------------------------------|--|-----------------------------------------------------------------------------------------------------------------------------------------------------------------------------------------------------------------------------------------------------------------------------------------------------------------------------------------------------------------------------------------------------------------|--------|--------|--------|--------------------------|
| A2FSB                       | Relative abundance of species with a bisecting GlcNAc within fucosylated sialylated diantennary glycans         |  | $A2FSB = (H4NSF1E1 + H5NSF1E1 + H5NSF1E1L1 + H5NSF1E2) / ((H4N4F1E1 + H5N4F1L1 + H5N4F1E1) + H4NSF1E1 + H5NSF1E1 + H5N4F1L2 + H5N4F1E1L1 + H5N4F1E2 + H5NSF1E1L1 + H5NSF1E2)$                                                                                                                                                                                                                                   | 0.2739 | 0.0128 | 4.67%  | 0.2831 0.014473 5.11%    |
| A2FSOB                      | Relative abundance of species with a bisecting GlcNAc within fucosylated non-sialylated diantennary glycans     |  | $A2FSOB = (H3NSF1 + H4NSF1 + H5NSF1) / ((H3N4F1 + H4N4F1 + H3NSF1 + H5N4F1 + H4NSF1 + H5NSF1))$                                                                                                                                                                                                                                                                                                                 | 0.1976 | 0.0160 | 8.10%  | 0.195265 0.010292 5.27%  |
| A2FOSB                      | Relative abundance of species with a bisecting GlcNAc within non-fucosylated sialylated diantennary glycans     |  | $A2FOSB = (H4NSE1 + H5NSE1 + H5NSE2) / ((H4N4E1 + H5N4L1 + H5N4E1 + H4NSE1 + H5NSE1 + H5N4L2 + H5N4E1L1 + H5N4E2 + H5NSE2))$                                                                                                                                                                                                                                                                                    | 0.0120 | 0.0031 | 25.79% | 0.006848 0.001154 16.86% |
| A2FOSOB                     | Relative abundance of species with a bisecting GlcNAc within non-fucosylated non-sialylated diantennary glycans |  | $A2FOSOB = (H3NS + H4NS + H5NS) / ((H4N4 + H3NS + H5N4 + H4NS + H5NS))$                                                                                                                                                                                                                                                                                                                                         | 0.4293 | 0.0531 | 12.36% | 0.386032 0.034029 8.82%  |
| Galactosylation per antenna |                                                                                                                 |  |                                                                                                                                                                                                                                                                                                                                                                                                                 |        |        |        |                          |
| A2FG                        | Galactosylation per antenna within fucosylated diantennary glycans                                              |  | $A2FG = (0.2 * (H3N4F1 + H3NSF1) + 1/2 * (H4N4F1 + H4NSF1 + H4N4F1E1 + H4NSF1E1)) + 2 * (H5N4F1 + H5NSF1 + H5N4F1L1 + H5N4F1E1 + H5NSF1E1 + H5N4F1L2 + H5N4F1E1L1 + H5N4F1E2 + H5NSF1E1L1 + H5NSF1E2) / ((H3N4F1 + H4N4F1 + H3NSF1 + H5N4F1 + H4NSF1 + H4N4F1E1 + H5NSF1 + H5N4F1L1 + H5N4F1E1 + H5NSF1E1) + H5N4F1L2 + H5N4F1E1L1 + H5N4F1E2 + H5NSF1E1L1 + H5NSF1E2)$                                         | 0.8476 | 0.0209 | 2.46%  | 0.786626 0.013715 1.74%  |
| A2F0G                       | Galactosylation per antenna within non-fucosylated diantennary glycans                                          |  | $A2F0G = (0.2 * (H3NS) + 1/2 * (H4N4 + H4NS + H4N4E1 + H4NSE1)) + 2 * (H5N4 + H5NS + H5N4L1 + H5N4E1 + H5NSE1 + H5N4L2 + H5N4E1L1 + H5N4E2 + H5NSE2) / ((H4N4 + H3NS + H5N4 + H4NS + H4N4E1 + H5NS + H5N4L1 + H5N4E1 + H4NSE1 + H5NSE1 + H5N4L2 + H5N4E1L1 + H5N4E2 + H5NSE2))$                                                                                                                                 | 0.9956 | 0.0011 | 0.11%  | 0.998993 0.000251 0.03%  |
| A2SG                        | Galactosylation per antenna within sialylated diantennary glycans                                               |  | $A2SG = (0.2 * (0) + 1/2 * (H4N4E1 + H4NSF1E1 + H4NSE1 + H4NSF1E1)) + 2 * (H5N4L1 + H5N4E1 + H5N4F1L1 + H5N4F1E1 + H5NSE1 + H5N4L2 + H5N4E1L1 + H5N4E2 + H5NSF1E1 + H5N4F1L2 + H5N4F1E1L1 + H5N4F1E2 + H5NSF1E1L1 + H5NSF1E2) / ((H4N4E1 + H5N4L1 + H4NSF1E1 + H5NSF1E1 + H4NSF1E1 + H5NSF1E1 + H5N4E1L1 + H5N4F1E1 + H5NSF1E1 + H5N4E2 + H5NSF1E1 + H5N4F1L2 + H5N4F1E1L1 + H5NSF1E2))$                        | 0.9941 | 0.0011 | 0.11%  | 0.99666 0.000444 0.04%   |
| A2FSG                       | Galactosylation per antenna within fucosylated sialylated diantennary glycans                                   |  | $A2FSG = (0.2 * (0) + 1/2 * (H4N4F1E1 + H4NSF1E1)) + 2 * (H5N4F1L1 + H5N4F1E1 + H5NSF1E1 + H5N4F1L2 + H5N4F1E1L1 + H5N4F1E2 + H5NSF1E1L1 + H5NSF1E2) / ((H4N4F1E1 + H5N4F1L1 + H5N4F1E1 + H4NSF1E1 + H5NSF1E1 + H5N4F1L2 + H5N4F1E1L1 + H5N4F1E2 + H5NSF1E1L1 + H5NSF1E2))$                                                                                                                                     | 0.9749 | 0.0043 | 0.45%  | 0.974878 0.0021 0.22%    |
| A2FS0G                      | Galactosylation per antenna within fucosylated non-sialylated diantennary glycans                               |  | $A2FS0G = (0.2 * (H3N4F1 + H3NSF1) + 1/2 * (H4N4F1 + H4NSF1)) + 2 * (H5N4F1 + H5NSF1) / ((H3N4F1 + H4N4F1 + H3NSF1 + H5N4F1 + H4NSF1 + H5NSF1))$                                                                                                                                                                                                                                                                | 0.5525 | 0.0218 | 3.95%  | 0.517457 0.013041 2.52%  |
| A2F0S0G                     | Galactosylation per antenna within non-fucosylated, non-sialylated diantennary glycans                          |  | $A2F0S0G = (0.2 * (H3NS) + 1/2 * (H4N4 + H4NS)) + 2 * (H5N4 + H5NS) / ((H4N4 + H3NS + H5N4 + H4NS + H5NS))$                                                                                                                                                                                                                                                                                                     | 0.6800 | 0.0466 | 6.85%  | 0.877198 0.014758 1.68%  |
| Sialylation per antenna     |                                                                                                                 |  |                                                                                                                                                                                                                                                                                                                                                                                                                 |        |        |        |                          |
| A3S                         | Sialylation per antenna within triantennary glycans                                                             |  | $A3S = (0.3 * (0) + 1/3 * (H6NSE1 + H6NSF1E1)) + 2 * (H6NSL2 + H6NSE1L1 + H6NSE2 + H6NSF1L2 + H6NSF1E1L1 + H6NSF1E2) + 3 * (H6NSE1L2 + H6NSE2L1 + H6NSE3 + H6NSF1E1L2 + H6NSF1E2L1 + H6NSF1E3 + H6NSF2E1L1 + H6NSF2E2L1) / ((H6NSE1 + H6NSF1E1 + H6NSE2 + H6NSF1L1 + H6NSE2 + H6NSF1L2 + H6NSF1E1L1 + H6NSF1E2 + H6NSE1L2 + H6NSE2L1 + H6NSE3 + H6NSF1E1L2 + H6NSF1E2L1 + H6NSF1E3 + H6NSF2E1L2 + H6NSF2E2L1))$ | 0.9269 | 0.0083 | 0.89%  | 0.920497 0.008739 0.95%  |
| A4S                         | Sialylation per antenna within tetra-antennary glycans                                                          |  | $A4S = (0.4 * (0) + 1/4 * (0) + 2 * (0) + 3 * (H7N6E1L2 + H7N6E2L1 + H7N6E3 + H7N6F1E1L2 + H7N6F1E2L1) + 4 * (H7N6E1L3 + H7N6E2L2 + H7N6E3L1 + H7N6F1E1L3 + H7N6F1E2L2 + H7N6F1E3L1 + H7N6F2E1L2)) / ((H7N6E1L2 + H7N6E2L1 + H7N6E3 + H7N6F1E1L2 + H7N6F1E2L1 + H7N6E1L3 + H7N6E2L2 + H7N6E3L1 + H7N6F1E1L3 + H7N6F1E2L2 + H7N6F1E3L1 + H7N6F2E1L2))$                                                           | 0.8983 | 0.0063 | 0.70%  | 0.905488 0.008524 0.94%  |

| Sialylation per galactose           |                                                                              |  |                                                                                                                                                                                                                                                                                                                                                                                                                                                                                                                                                                                                                                                                                                                                                                                                                                                                                                                                                                                                                                                                                                                                                                                                                                                                                                  |        |        |       |          |          |       |
|-------------------------------------|------------------------------------------------------------------------------|--|--------------------------------------------------------------------------------------------------------------------------------------------------------------------------------------------------------------------------------------------------------------------------------------------------------------------------------------------------------------------------------------------------------------------------------------------------------------------------------------------------------------------------------------------------------------------------------------------------------------------------------------------------------------------------------------------------------------------------------------------------------------------------------------------------------------------------------------------------------------------------------------------------------------------------------------------------------------------------------------------------------------------------------------------------------------------------------------------------------------------------------------------------------------------------------------------------------------------------------------------------------------------------------------------------|--------|--------|-------|----------|----------|-------|
| A2GS                                | Sialylation per galactose within disialotriantennary glycans                 |  | $A2GS = ((0.2 * (H3N4F1 + H4N4 + H3N5 + H4N4F1 + H3N4 + H3NSF1 + H4N5 + H3NF1 + H4NSF1 + H3NS + H3NSF1)) + 1/2 * (H4N4E1 + H3N4L1 + H4N4F1E1 + H3N4E1 + H3NSE1 + H3NF1L1 + H3NF1E1 + H3NSF1E1 + H3NSE1 + H3NSF1E1)) + 2/2 * (H3N4L2 + H3N4E1L1 + H3N4E2 + H3NF1L2 + H3NF1E2 + H3NSE2 + H3NSF1L1 + H3NSF1E2)) / ((H3N4F1 + H4N4 + H3N5 + H4N4F1 + H3N4 + H3NSF1 + H4N5 + H3NF1 + H4NSF1 + H3NS + H3NSF1 + H4N4E1 + H3N4L1 + H3N4F1E1 + H3N4E1 + H3NSE1 + H3NF1L1 + H3NF1E1 + H3NSF1E1 + H3NSE1 + H3NSF1E1 + H3NSL2 + H3N4E1L1 + H3N4E2 + H3NSF1E1 + H3NF1L2 + H3NF1E2 + H3NSE2 + H3NSF1L1 + H3NSF1E2)) / ((0.2 * (H3N4F1 + H3N5 + H3NSF1)) + 1/2 * (H4N4 + H3NF1 + H3NF1L2 + H3NF1E1L1 + H3NF1E2 + H3NSE2 + H3NSF1L1 + H3NSF1E2)) / ((0.2 * (H3N4F1 + H3N5 + H3NSF1)) + 1/2 * (H4N4 + H3NF1 + H3NF1L2 + H3NF1E1L1 + H3NF1E2 + H3NSE2 + H3NSF1L1 + H3NSF1E2)) + 2/2 * (H3N4 + H3NF1 + H3NS + H3NF1 + H3NSF1 + H3NSL2 + H3N4E1L1 + H3N4E2 + H3NSF1E1 + H3NF1L2 + H3NF1E2 + H3NSE2 + H3NSF1L1 + H3NSF1E2)) / ((H3N4F1 + H4N4 + H3N5 + H4N4F1 + H3N4 + H3NSF1 + H4N5 + H3NF1 + H4NSF1 + H3NS + H3NSF1 + H4N4E1 + H3N4L1 + H3N4F1E1 + H3N4E1 + H3NSE1 + H3NF1L1 + H3NF1E1 + H3NSF1E1 + H3NSE1 + H3NSF1E1 + H3NSL2 + H3N4E1L1 + H3N4E2 + H3NSF1E1 + H3NF1L2 + H3NF1E2 + H3NSE2 + H3NSF1L1 + H3NSF1E2))$ | 0.8924 | 0.0144 | 1.61% | 0.864516 | 0.010983 | 1.27% |
| A2FGS                               | Sialylation per galactose within fucosylated disialotriantennary glycans     |  | $A2FGS = ((0.2 * (H3N4F1 + H4N4F1 + H3NSF1 + H3NF1 + H4NSF1 + H3NSF1)) + 1/2 * (H4N4F1E1 + H3NF1L1 + H3NF1E1 + H3NSF1E1)) + 2/2 * (H3N4F1L2 + H3N4F1E1L1 + H3N4F1E2 + H3NSF1L1 + H3NSF1E2)) / ((H3N4F1 + H4N4F1 + H3NSF1 + H3NF1 + H4NSF1 + H3NSF1 + H3NSL2 + H3N4E1L1 + H3N4E2 + H3NSF1E1 + H3NF1L2 + H3NF1E2 + H3NSE2 + H3NSF1L1 + H3NSF1E2)) / ((0.2 * (H3N4F1 + H3NSF1)) + 1/2 * (H4N4 + H3NF1 + H3NF1L2 + H3NF1E1L1 + H3NF1E2 + H3NSE2 + H3NSF1L1 + H3NSF1E2)) / ((H3N4F1 + H4N4F1 + H3NSF1 + H3NF1 + H4NSF1 + H3NSF1 + H3NSL2 + H3N4E1L1 + H3N4E2 + H3NSF1E1 + H3NF1L2 + H3NF1E2 + H3NSE2 + H3NSF1L1 + H3NSF1E2))$                                                                                                                                                                                                                                                                                                                                                                                                                                                                                                                                                                                                                                                                         | 0.6681 | 0.0340 | 5.09% | 0.603623 | 0.021313 | 3.53% |
| A2F6GS                              | Sialylation per galactose within non-fucosylated disialotriantennary glycans |  | $A2F6GS = ((0.2 * (H4N4 + H3N5 + H3N4 + H4N5 + H3NS)) + 1/2 * (H4N4E1 + H3N4L1 + H3N4E1 + H3NSE1 + H3NSF1E1)) + 2/2 * (H3N4L2 + H3N4E1L1 + H3N4E2 + H3NSF1L2 + H3NSF1E2)) / ((H4N4 + H3N5 + H3N4 + H4N5 + H3NS + H3N4E1 + H3NS + H3N4L1 + H3N4E1 + H3NSE1 + H3NSL2 + H3N4E1L1 + H3N4E2 + H3NSF1L1 + H3NSF1E2)) / ((0.2 * (H3N5)) + 1/2 * (H4N4 + H4N5 + H4N4E1 + H4NSE1)) + 2/2 * (H3N4 + H3NS + H3N4L1 + H3N4E1 + H3NSE1 + H3NSL2 + H3N4E1L1 + H3N4E2 + H3NSF1L1 + H3NSF1E2)) / ((H4N4 + H3N5 + H3N4 + H4N5 + H3NS + H3N4L1 + H3N4E1 + H3NSE1 + H3NSL2 + H3N4E1L1 + H3N4E2 + H3NSF1L1 + H3NSF1E2))$                                                                                                                                                                                                                                                                                                                                                                                                                                                                                                                                                                                                                                                                                             | 0.9383 | 0.0062 | 0.66% | 0.916688 | 0.008209 | 0.90% |
| A4FGS                               | Sialylation per galactose within fucosylated tetra-antennary glycans         |  | $A4FGS = ((0.4 * (0 + 1.4 * (0 + 2.4 * (0 + 3.4 * (H7N6F1E1L2 + H7N6F1E2L1)) + 4.4 * (H7N6F1E1L3 + H7N6F1E2L2 + H7N6F1E3L1 + H7N6F2E2L2)) / ((0.4 * (0 + 1.4 * (0 + 2.4 * (0 + 3.4 * (0 + 4.4 * (H7N6F1E1L2 + H7N6F1E2L1 + H7N6F1E3L1 + H7N6F2E2L2)) / (H7N6E1L2 + H7N6E2L1 + H7N6E3 + H7N6F1E1L2 + H7N6F1E2L1 + H7N6E1L3 + H7N6E2L2 + H7N6E3L1 + H7N6F1E1L3 + H7N6F1E2L2 + H7N6F1E3L1 + H7N6F2E2L2)) / (H7N6E1L2 + H7N6E2L1 + H7N6E3 + H7N6F1E1L2 + H7N6F1E2L1 + H7N6E1L3 + H7N6E2L2 + H7N6E3L1 + H7N6F1E1L3 + H7N6F1E2L2 + H7N6F1E3L1 + H7N6F2E2L2))$                                                                                                                                                                                                                                                                                                                                                                                                                                                                                                                                                                                                                                                                                                                                          | 0.9084 | 0.0091 | 1.00% | 0.930707 | 0.008443 | 0.91% |
| <b>a2,3-sialylation per antenna</b> |                                                                              |  |                                                                                                                                                                                                                                                                                                                                                                                                                                                                                                                                                                                                                                                                                                                                                                                                                                                                                                                                                                                                                                                                                                                                                                                                                                                                                                  |        |        |       |          |          |       |
| A2L                                 | a2,3-sialylation per antenna within disialotriantennary glycans              |  | $A2L = (0.2 * (H3N4F1 + H4N4 + H3N5 + H4N4F1 + H3N4 + H3NSF1 + H4N5 + H3NF1 + H4NSF1 + H3NS + H3NSF1 + H4N4E1 + H3N4L1 + H3N4F1E1 + H3N4E1 + H3NSE1 + H3NF1L1 + H3NF1E1 + H3NSF1E1 + H3NSE1 + H3NSF1E1 + H3NSL2 + H3N4E1L1 + H3N4E2 + H3NSF1E1 + H3NF1L2 + H3NF1E1L1 + H3NF1E2 + H3NSE2 + H3NSF1L1 + H3NSF1E2)) / ((H3N4F1 + H4N4 + H3N5 + H4N4F1 + H3N4 + H3NSF1 + H4N5 + H3NF1 + H4NSF1 + H3NS + H3NSF1 + H4N4E1 + H3N4L1 + H3N4F1E1 + H3N4E1 + H3NSE1 + H3NF1L1 + H3NF1E1 + H3NSF1E1 + H3NSE1 + H3NSF1E1 + H3NSL2 + H3N4E1L1 + H3N4E2 + H3NSF1E1 + H3NF1L2 + H3NF1E1L1 + H3NF1E2 + H3NSE2 + H3NSF1L1 + H3NSF1E2)) / ((0.2 * (H3N4F1 + H3NSF1)) + 1/2 * (H4N4 + H3NF1 + H3NF1L2 + H3NF1E1L1 + H3NF1E2 + H3NSE2 + H3NSF1L1 + H3NSF1E2)) / ((H3N4F1 + H4N4 + H3N5 + H4N4F1 + H3N4 + H3NSF1 + H4N5 + H3NF1 + H4NSF1 + H3NS + H3NSF1 + H4N4E1 + H3N4L1 + H3N4F1E1 + H3N4E1 + H3NSE1 + H3NF1L1 + H3NF1E1 + H3NSF1E1 + H3NSE1 + H3NSF1E1 + H3NSL2 + H3N4E1L1 + H3N4E2 + H3NSF1E1 + H3NF1L2 + H3NF1E1L1 + H3NF1E2 + H3NSE2 + H3NSF1L1 + H3NSF1E2))$                                                                                                                                                                                                                                                   | 0.0568 | 0.0044 | 7.70% | 0.036526 | 0.003373 | 9.23% |
| A3L                                 | a2,3-sialylation per antenna within triantennary glycans                     |  | $A3L = (0.3 * (H6NSE1 + H6NSF1E1 + H6NSE2 + H6NSF1E2 + H6NSE3 + H6NSF1E3)) + 1/3 * (H6NSE1L1 + H6NSF1E1L1 + H6NSE2L1 + H6NSF1E2L1 + H6NSE3L1 + H6NSF1E3L1)) + 2/3 * (H6NSL2 + H6NSF1L2 + H6NSE1L2 + H6NSF1E1L2 + H6NSE2L2 + H6NSF1E2L2) + 3/3 * (0) / ((H6NSE1 + H6NSF1E1 + H6NSE2 + H6NSF1E2 + H6NSE3 + H6NSF1E3) + H6NSE1L1 + H6NSF1E1L1 + H6NSE2L1 + H6NSF1E2L1 + H6NSE3L1 + H6NSF1E3L1)$                                                                                                                                                                                                                                                                                                                                                                                                                                                                                                                                                                                                                                                                                                                                                                                                                                                                                                     | 0.2779 | 0.0052 | 1.86% | 0.269443 | 0.007864 | 2.92% |
| A4L                                 | a2,3-sialylation per antenna within tetra-antennary glycans                  |  | $A4L = (0.4 * (H7N6E3 + 1.4 * (H7N6E2L1 + H7N6F1E2L1 + H7N6E3L1 + H7N6F1E3L1)) + 2.4 * (H7N6E1L2 + H7N6F1E1L2 + H7N6E2L2 + H7N6F1E2L2 + H7N6E3L2 + H7N6F1E3L2)) / ((H7N6E3 + 1.4 * (H7N6E2L1 + H7N6F1E2L1 + H7N6E3L1 + H7N6F1E3L1)) + 2.4 * (H7N6E1L2 + H7N6F1E1L2 + H7N6E2L2 + H7N6F1E2L2 + H7N6E3L2 + H7N6F1E3L2)) / ((H7N6E1L2 + H7N6E2L1 + H7N6E3 + H7N6F1E1L2 + H7N6F1E2L1 + H7N6E1L3 + H7N6E2L2 + H7N6E3L1 + H7N6F1E1L3 + H7N6F1E2L2 + H7N6F1E3L1 + H7N6F2E2L2)) / ((H7N6E1L2 + H7N6E2L1 + H7N6E3 + H7N6F1E1L2 + H7N6F1E2L1 + H7N6E1L3 + H7N6E2L2 + H7N6E3L1 + H7N6F1E1L3 + H7N6F1E2L2 + H7N6F1E3L1 + H7N6F2E2L2))$                                                                                                                                                                                                                                                                                                                                                                                                                                                                                                                                                                                                                                                                        | 0.4712 | 0.0103 | 2.18% | 0.515143 | 0.01139  | 2.21% |

| a2,6-sialylation per antenna   |                                                                               |  |                                                                                                                                                                                                                                                                                                                                                                                                                                                                                                                                                                                                                |        |        |       |          |          |        |
|--------------------------------|-------------------------------------------------------------------------------|--|----------------------------------------------------------------------------------------------------------------------------------------------------------------------------------------------------------------------------------------------------------------------------------------------------------------------------------------------------------------------------------------------------------------------------------------------------------------------------------------------------------------------------------------------------------------------------------------------------------------|--------|--------|-------|----------|----------|--------|
| A2E                            | a2,6-sialylation per antenna within diantennary glycans                       |  | $A2E = ((0.2 * (H3N4F1 + H4N4 + H3N5 + H4N4F1 + H3N4 + H3N5F1 + H4N5 + H3N4F1 + H4N5F1 + H3N5 + H3N4L1 + H3N5F1 + H3N4F1L1 + H3N4L2 + H3N4F1L2) + 1/2 * (H4N4E1 + H4N4F1E1 + H3N4E1 + H4N5E1 + H3N4E1 + H4N5E1 + H3N4E1L1 + H3N4F1E1L1 + H3N4E1L1L1 + H3N4F1E1L1L1 + H3N4E1L1L1L1 + H3N4F1E1L1L1L1)) / ((H4N4F1 + H4N4 + H3N5 + H4N4F1 + H3N4 + H3N5F1 + H4N5 + H4N4E1 + H4N5E1 + H3N4L1 + H4N4F1L1 + H3N4L2 + H3N4F1L2 + H3N4E1L1 + H3N4F1E1L1 + H3N4E1L1L1 + H3N4F1E1L1L1 + H3N4E1L1L1L1 + H3N4F1E1L1L1L1))$                                                                                                 | 0.8062 | 0.0200 | 2.47% | 0.789328 | 0.015944 | 2.02%  |
| A3E                            | a2,6-sialylation per antenna within triantennary glycans                      |  | $A3E = ((0.3 * (H6N2L2 + H6N5F1L2) + 1/3 * (H6N5E1 + H6N5F1E1 + H6N5E1L1 + H6N5F1E1L1 + H6N5E1L2 + H6N5F1E1L2 + H6N5E1L2L1) + 2/3 * (H6N5E2 + H6N5F1E2 + H6N5E2L1 + H6N5F1E2L1 + H6N5E2L1L1 + H6N5F1E2L1L1)) + 3/3 * (H6N5E3 + H6N5F1E3)) / ((H6N5E1 + H6N5F1E1 + H6N5E2 + H6N5F1E2 + H6N5E2L1 + H6N5F1E2L1 + H6N5E2L1L1 + H6N5F1E2L1L1 + H6N5E2L1L1L1 + H6N5F1E2L1L1L1))$                                                                                                                                                                                                                                     | 0.6490 | 0.0072 | 1.11% | 0.651003 | 0.006438 | 0.99%  |
| A4E                            | a2,6-sialylation per antenna within tetra-antennary glycans                   |  | $A4E = ((0.4 * (0) + 1/4 * (H7N6E1L2 + H7N6F1E1L2 + H7N6E1L3 + H7N6F1E1L3) + 2/4 * (H7N6E2L1 + H7N6F1E2L1 + H7N6E2L2 + H7N6F1E2L2) + H7N6E2L2L1) + 3/4 * (H7N6E3 + H7N6F1E3L1 + H7N6E3L1L1 + H7N6F1E3L1L1)) + 4/4 * (0) / ((H7N6E1L2 + H7N6F1E1L2 + H7N6E1L3 + H7N6F1E1L3 + H7N6E2L1 + H7N6F1E2L1 + H7N6E2L2 + H7N6F1E2L2 + H7N6E2L2L1 + H7N6F1E2L2L1))$                                                                                                                                                                                                                                                       | 0.4272 | 0.0082 | 1.93% | 0.39385  | 0.011386 | 2.89%  |
| a2,3-sialylation per galactose |                                                                               |  |                                                                                                                                                                                                                                                                                                                                                                                                                                                                                                                                                                                                                |        |        |       |          |          |        |
| A2FGL                          | a2,3-sialylation per galactose within fucosylated diantennary glycans         |  | $A2FGL = ((0.2 * (H3N4F1 + H4N4F1 + H3N5F1 + H4N4F1 + H4N5F1 + H3N5F1 + H4N4F1E1 + H3N5F1E1 + H3N4F1E2 + H3N5F1E2) + 1/2 * (H3N4F1L1 + H3N4F1E1L1 + H3N5F1E1L1 + 2/2 * (H3N4F1L2) / (H3N4F1 + H4N4F1 + H3N5F1 + H4N4F1 + H4N5F1 + H3N4F1E1 + H3N5F1E1 + H3N4F1E2 + H3N5F1E2)) / (H3N4F1 + H4N4F1 + H3N5F1 + H4N4F1E1 + H3N5F1E1 + H3N4F1E2 + H3N5F1E2)) / ((0.2 * (H3N4F1 + H3N5F1) + 1/2 * (H4N4F1 + H4N4F1E1 + H4N4F1L1 + H4N4F1L2) + 2/2 * (H3N4F1L2) / (H3N4F1 + H4N4F1 + H3N5F1 + H4N4F1E1 + H3N5F1E1 + H3N4F1E2 + H3N5F1E2)) / (H3N4F1 + H4N4F1 + H3N5F1 + H4N4F1E1 + H3N5F1E1 + H3N4F1E2 + H3N5F1E2))$  | 0.1278 | 0.0101 | 7.88% | 0.092623 | 0.006654 | 7.18%  |
| A2FGL                          | a2,3-sialylation per galactose within non-fucosylated diantennary glycans     |  | $A2FGL = ((0.2 * (H4N4 + H3N5 + H3N4 + H4N5 + H4N4E1 + H3N5 + H3N4E1 + H4N5E1 + H3N4E2 + H3N5E2) + 1/2 * (H3N4L1 + H3N4E1L1) + 2/2 * (H3N4L2) / (H4N4 + H3N5 + H3N4 + H4N5 + H4N4E1 + H3N5 + H3N4L1 + H3N4E1 + H3N5E1 + H3N4L2 + H3N4E1L1 + H3N4E2 + H3N5E2)) / ((0.2 * (H3N5) + 1/2 * (H4N4 + H4N5 + H4N4E1 + H3N5E1)) + 2/2 * (H3N4 + H3N5 + H3N4L1 + H3N4E1 + H3N5E1 + H3N4L2 + H3N4E1L1 + H3N4E2 + H3N5E2)) / (H4N4 + H3N5 + H3N4 + H4N5 + H4N4E1 + H3N5 + H3N4L1 + H3N4E1 + H3N5E1 + H3N4L2 + H3N4E1L1 + H3N4E2 + H3N5E2))$                                                                               | 0.0445 | 0.0039 | 8.67% | 0.027291 | 0.002993 | 10.97% |
| A4FGL                          | a2,3-sialylation per galactose within fucosylated tetra-antennary glycans     |  | $A4FGL = ((0.4 * (0) + 1/4 * (H7N6F1E2L1 + H7N6F1E3L1) + 2/4 * (H7N6F1E2L2 + H7N6F1E2L2L1 + H7N6F1E3L1) + 3/4 * (H7N6F1E3L1L1 + H7N6F1E3L1L1L1) + H7N6F1E2L2L2) / ((0.4 * (0) + 1/4 * (0) + 2/4 * (0) + 3/4 * (0) + 4/4 * (H7N6F1E2L2 + H7N6F1E3L1 + H7N6F1E3L1L1 + H7N6F1E2L2L1 + H7N6F1E2L2L1L1 + H7N6F1E3L1L1L1 + H7N6F1E2L2L2 + H7N6F1E2L2L2L1 + H7N6F1E3L1L1L1L1)) / (H7N6F1E2L2 + H7N6F1E3L1 + H7N6F1E3L1L1 + H7N6F1E2L2L1 + H7N6F1E2L2L1L1 + H7N6F1E3L1L1L1 + H7N6F1E2L2L2 + H7N6F1E2L2L2L1 + H7N6F1E3L1L1L1L1))$                                                                                       | 0.4869 | 0.0142 | 2.92% | 0.554988 | 0.0148   | 2.67%  |
| A4FGL                          | a2,3-sialylation per galactose within non-fucosylated tetra-antennary glycans |  | $A4FGL = ((0.4 * (0) + 1/4 * (H7N6E2L1 + H7N6E3L1) + 2/4 * (H7N6E2L2 + H7N6E2L2L1) + 3/4 * (H7N6E3L1L1 + H7N6E3L1L1L1) + H7N6E2L2L2) / ((0.4 * (0) + 1/4 * (0) + 2/4 * (0) + 3/4 * (0) + 4/4 * (H7N6E2L2 + H7N6E3L1 + H7N6E3L1L1 + H7N6E2L2L1 + H7N6E2L2L1L1 + H7N6E3L1L1L1 + H7N6E2L2L2 + H7N6E2L2L2L1 + H7N6E3L1L1L1L1)) / (H7N6E2L2 + H7N6E3L1 + H7N6E3L1L1 + H7N6E2L2L1 + H7N6E2L2L1L1 + H7N6E3L1L1L1 + H7N6E2L2L2 + H7N6E2L2L2L1 + H7N6E3L1L1L1L1))$                                                                                                                                                      | 0.4629 | 0.0120 | 2.58% | 0.488436 | 0.013871 | 2.84%  |
| a2,6-sialylation per galactose |                                                                               |  |                                                                                                                                                                                                                                                                                                                                                                                                                                                                                                                                                                                                                |        |        |       |          |          |        |
| A2FGE                          | a2,6-sialylation per galactose within fucosylated diantennary glycans         |  | $A2FGE = ((0.2 * (H3N4F1 + H4N4F1 + H3N5F1 + H4N4F1 + H4N5F1 + H3N5F1 + H3N4F1L1 + H3N4F1L2) + 1/2 * (H4N4F1E1 + H3N4F1E1 + H3N5F1E1 + H3N4F1E1L1 + H3N5F1E1L1) + 2/2 * (H3N4F1L2) / (H3N4F1 + H4N4F1 + H3N5F1 + H4N4F1 + H4N5F1 + H3N4F1E1 + H3N5F1E1 + H3N4F1E2 + H3N5F1E2)) / (H3N4F1 + H4N4F1 + H3N5F1 + H4N4F1E1 + H3N5F1E1 + H3N4F1E2 + H3N5F1E2)) / ((0.2 * (H3N4F1 + H3N5F1) + 1/2 * (H4N4F1 + H4N4F1E1 + H4N4F1L1 + H4N4F1L2) + 2/2 * (H3N4F1L2) / (H3N4F1 + H4N4F1 + H3N5F1 + H4N4F1E1 + H3N5F1E1 + H3N4F1E2 + H3N5F1E2)) / (H3N4F1 + H4N4F1 + H3N5F1 + H4N4F1E1 + H3N5F1E1 + H3N4F1E2 + H3N5F1E2))$ | 0.5375 | 0.0269 | 5.00% | 0.51117  | 0.01797  | 3.48%  |
| A2FGE                          | a2,6-sialylation per galactose within non-fucosylated diantennary glycans     |  | $A2FGE = ((0.2 * (H4N4 + H3N5 + H3N4 + H4N5 + H4N4E1 + H3N5 + H3N4L1 + H3N4E1 + H4N5E1 + H3N4E2 + H3N5E2) + 1/2 * (H4N4E1 + H3N4E1 + H4N5E1 + H3N4E2 + H3N5E2) + 2/2 * (H3N4L2) / (H4N4 + H3N5 + H3N4 + H4N5 + H4N4E1 + H3N5 + H3N4L1 + H3N4E1 + H4N5E1 + H3N4E2 + H3N5E2)) / ((0.2 * (H3N5) + 1/2 * (H4N4 + H4N5 + H4N4E1 + H3N5E1)) + 2/2 * (H3N4 + H3N5 + H3N4L1 + H3N4E1 + H3N5E1 + H3N4L2 + H3N4E1L1 + H3N4E2 + H3N5E2)) / (H4N4 + H3N5 + H3N4 + H4N5 + H4N4E1 + H3N5 + H3N4L1 + H3N4E1 + H4N5E1 + H3N4E2 + H3N5E2))$                                                                                     | 0.8937 | 0.0085 | 0.95% | 0.889369 | 0.009482 | 1.07%  |
| A4FGE                          | a2,6-sialylation per galactose within fucosylated tetra-antennary glycans     |  | $A4FGE = ((0.4 * (0) + 1/4 * (H7N6F1E2L1 + H7N6F1E3L1) + 2/4 * (H7N6F1E2L2 + H7N6F1E2L2L1) + 3/4 * (H7N6F1E3L1L1 + H7N6F1E3L1L1L1) + H7N6F1E2L2L2) / ((0.4 * (0) + 1/4 * (0) + 2/4 * (0) + 3/4 * (0) + 4/4 * (H7N6F1E2L2 + H7N6F1E3L1 + H7N6F1E3L1L1 + H7N6F1E2L2L1 + H7N6F1E2L2L1L1 + H7N6F1E3L1L1L1 + H7N6F1E2L2L2 + H7N6F1E2L2L2L1 + H7N6F1E3L1L1L1L1)) / (H7N6F1E2L2 + H7N6F1E3L1 + H7N6F1E3L1L1 + H7N6F1E2L2L1 + H7N6F1E2L2L1L1 + H7N6F1E3L1L1L1 + H7N6F1E2L2L2 + H7N6F1E2L2L2L1 + H7N6F1E3L1L1L1L1))$                                                                                                    | 0.4216 | 0.0114 | 2.70% | 0.375431 | 0.009097 | 2.42%  |
| A4FGE                          | a2,6-sialylation per galactose within non-fucosylated tetra-antennary glycans |  | $A4FGE = ((0.4 * (0) + 1/4 * (H7N6E2L1 + H7N6E3L1) + 2/4 * (H7N6E2L2 + H7N6E2L2L1) + 3/4 * (H7N6E3L1L1 + H7N6E3L1L1L1) + H7N6E2L2L2) / ((0.4 * (0) + 1/4 * (0) + 2/4 * (0) + 3/4 * (0) + 4/4 * (H7N6E2L2 + H7N6E3L1 + H7N6E3L1L1 + H7N6E2L2L1 + H7N6E2L2L1L1 + H7N6E3L1L1L1 + H7N6E2L2L2 + H7N6E2L2L2L1 + H7N6E3L1L1L1L1)) / (H7N6E2L2 + H7N6E3L1 + H7N6E3L1L1 + H7N6E2L2L1 + H7N6E2L2L1L1 + H7N6E3L1L1L1 + H7N6E2L2L2 + H7N6E2L2L2L1 + H7N6E3L1L1L1L1))$                                                                                                                                                      | 0.4305 | 0.0103 | 2.38% | 0.406343 | 0.017863 | 4.40%  |

**Supplementary Table 4. DiaGene Imputed clinical characteristics**

| <b>Name</b>                                     | <b>DiaGene with imputed data</b> | <b>Count of imputations</b> |
|-------------------------------------------------|----------------------------------|-----------------------------|
| Duration of diabetes, yr, median (IQR)          | 7.90 (3.40-14.00)                | 116                         |
| BMI, kg/m <sup>2</sup> , mean ( $\pm$ sd)       | 30.45 (5.45)                     | 126                         |
| HDL-c, mmol/L, mean ( $\pm$ sd)                 | 1.17 (0.32)                      | 90                          |
| Non-HDL-c, mmol/L, mean ( $\pm$ sd)             | 3.12 (0.90)                      | 90                          |
| Creatinine, $\mu$ mol/L, mean ( $\pm$ sd)       | 83.31 (28.24)                    | 118                         |
| HbA1c, mmol/mol, mean ( $\pm$ sd)               | 53.23 (1.06)                     | 89                          |
| Systolic blood pressure, mmHg, mean ( $\pm$ sd) | 142.38 (18.97)                   | 123                         |
| Smoking, no/former/yes                          | 479/1014/322                     | 172                         |



**Supplementary Table 5. Hoorn DCS Imputed clinical characteristics**

| Name                                            | Hoorn DCS with imputed data | Count of imputations |
|-------------------------------------------------|-----------------------------|----------------------|
| Duration of diabetes, yr, median (IQR)          | 5.96 (2.92-9.90)            | 1                    |
| BMI, kg/m <sup>2</sup> , mean ( $\pm$ sd)       | 30.31 (5.43)                | 19                   |
| HDL-c, mmol/L, mean ( $\pm$ sd)                 | 1.18 (0.39)                 | 19                   |
| Non-HDL-c, mmol/L, mean ( $\pm$ sd)             | 3.46 (1.47)                 | 20                   |
| Creatinine, $\mu$ mol/L, mean ( $\pm$ sd)       | 79.75 (22.17)               | 18                   |
| HbA1c, mmol/mol, mean ( $\pm$ sd)               | 50.84 (11.44)               | 18                   |
| Systolic blood pressure, mmHg, mean ( $\pm$ sd) | 143.80 (19.29)              | 9                    |
| Smoking, no/former/yes                          | 920/335/263                 | 13                   |

**Supplementary Table 6. Meta analysed associations between derived glycan traits and cardiovascular disease in type 2 diabetes in the basic model. Glycan values are centered and scaled. The *p*-values after FDR correction that are significant ( $\leq 0.05$ ) are highlighted in green. Red represents a positive association and blue a negative association. Basic model: age, sex and the interaction thereof.**

| Prevalent (cross-sectional) |        |        |         |         |        |        |        |      |        |          |
|-----------------------------|--------|--------|---------|---------|--------|--------|--------|------|--------|----------|
| glycome                     | OR     | SE     | CIlower | CIupper | pval   | I2     | I2pval | n    | nevent | pval.FDR |
| A2E                         | 1.0888 | 0.0425 | 1.0018  | 1.1833  | 0.0452 | 0.0000 | 0.9965 | 3187 | 916    | 0.1043   |
| A2E0F                       | 0.8581 | 0.0423 | 0.7898  | 0.9323  | 0.0003 | 0.0000 | 0.6188 | 3187 | 916    | 0.0022   |
| A2EF                        | 0.9101 | 0.0425 | 0.8373  | 0.9892  | 0.0267 | 0.0000 | 0.7852 | 3187 | 916    | 0.0752   |
| A2F                         | 0.9076 | 0.0424 | 0.8353  | 0.9862  | 0.0221 | 0.0000 | 0.8689 | 3187 | 916    | 0.0710   |
| A2F0G                       | 0.9725 | 0.0417 | 0.8961  | 1.0555  | 0.5048 | 0.0000 | 0.3700 | 3187 | 916    | 0.6883   |
| A2F0GE                      | 1.0391 | 0.0433 | 0.9546  | 1.1311  | 0.3753 | 0.0000 | 0.6857 | 3187 | 916    | 0.5629   |
| A2F0GL                      | 0.9446 | 0.0616 | 0.8371  | 1.0659  | 0.3553 | 0.4894 | 0.1617 | 3187 | 916    | 0.5514   |
| A2F0GS                      | 1.0043 | 0.0431 | 0.9228  | 1.0929  | 0.9216 | 0.0000 | 0.6720 | 3187 | 916    | 0.9644   |
| A2F0S0B                     | 1.1318 | 0.0726 | 0.9818  | 1.3047  | 0.0880 | 0.6338 | 0.0985 | 3187 | 916    | 0.1799   |
| A2F0S0G                     | 0.9265 | 0.0425 | 0.8524  | 1.0070  | 0.0725 | 0.0000 | 0.8385 | 3187 | 916    | 0.1553   |
| A2F0SB                      | 0.9907 | 0.0415 | 0.9133  | 1.0746  | 0.8211 | 0.0000 | 0.6122 | 3187 | 916    | 0.9032   |
| A2FG                        | 0.9921 | 0.0434 | 0.9112  | 1.0802  | 0.8553 | 0.0000 | 0.9302 | 3187 | 916    | 0.9164   |
| A2FGE                       | 1.0527 | 0.0426 | 0.9684  | 1.1442  | 0.2278 | 0.0000 | 0.7157 | 3187 | 916    | 0.3701   |
| A2FGL                       | 1.1097 | 0.0723 | 0.9632  | 1.2786  | 0.1496 | 0.6396 | 0.0958 | 3187 | 916    | 0.2806   |
| A2FGS                       | 1.1170 | 0.0430 | 1.0267  | 1.2153  | 0.0101 | 0.0000 | 0.5760 | 3187 | 916    | 0.0413   |
| A2FS0B                      | 1.3827 | 0.0444 | 1.2674  | 1.5084  | 0.0000 | 0.0000 | 0.8936 | 3187 | 916    | 0.0000   |
| A2FS0G                      | 0.8895 | 0.0475 | 0.8104  | 0.9764  | 0.0138 | 0.0000 | 0.6219 | 3187 | 916    | 0.0494   |
| A2FSB                       | 1.0139 | 0.0442 | 0.9297  | 1.1057  | 0.7556 | 0.0760 | 0.2982 | 3187 | 916    | 0.9032   |
| A2FSG                       | 1.0001 | 0.0424 | 0.9203  | 1.0868  | 0.9987 | 0.0000 | 0.4300 | 3187 | 916    | 0.9987   |
| A2GS                        | 1.1000 | 0.0429 | 1.0114  | 1.1964  | 0.0261 | 0.0000 | 0.9569 | 3187 | 916    | 0.0752   |
| A2L                         | 1.0025 | 0.0426 | 0.9222  | 1.0899  | 0.9525 | 0.0000 | 0.9964 | 3187 | 916    | 0.9741   |
| A2L0F                       | 0.9014 | 0.0424 | 0.8295  | 0.9794  | 0.0143 | 0.0000 | 0.6431 | 3187 | 916    | 0.0494   |
| A2LF                        | 1.0252 | 0.1111 | 0.8245  | 1.2746  | 0.8229 | 0.8402 | 0.0124 | 3187 | 916    | 0.9032   |
| A2S0F                       | 0.8808 | 0.0415 | 0.8120  | 0.9554  | 0.0022 | 0.0000 | 0.6803 | 3187 | 916    | 0.0125   |
| A2SG                        | 1.0643 | 0.0422 | 0.9799  | 1.1560  | 0.1395 | 0.0000 | 0.7530 | 3187 | 916    | 0.2729   |
| A3E                         | 1.1687 | 0.0427 | 1.0748  | 1.2708  | 0.0003 | 0.0000 | 0.3510 | 3187 | 916    | 0.0022   |
| A3F                         | 0.9469 | 0.1206 | 0.7477  | 1.1994  | 0.6512 | 0.8599 | 0.0075 | 3187 | 916    | 0.8618   |
| A3L                         | 0.8696 | 0.0517 | 0.7858  | 0.9623  | 0.0069 | 0.3114 | 0.2282 | 3187 | 916    | 0.0343   |
| A3L0F                       | 0.8562 | 0.1139 | 0.6849  | 1.0703  | 0.1727 | 0.8363 | 0.0135 | 3187 | 916    | 0.3109   |
| A3LF                        | 0.9709 | 0.1187 | 0.7693  | 1.2253  | 0.8035 | 0.8569 | 0.0082 | 3187 | 916    | 0.9032   |
| A3S                         | 0.9654 | 0.0418 | 0.8895  | 1.0478  | 0.4000 | 0.0000 | 0.7322 | 3187 | 916    | 0.5807   |
| A4E                         | 1.2270 | 0.0509 | 1.1106  | 1.3556  | 0.0001 | 0.2699 | 0.2419 | 3187 | 916    | 0.0009   |
| A4F                         | 0.9736 | 0.1154 | 0.7765  | 1.2207  | 0.8167 | 0.8473 | 0.0105 | 3187 | 916    | 0.9032   |
| A4F0GE                      | 1.2457 | 0.0424 | 1.1464  | 1.3537  | 0.0000 | 0.0000 | 0.6093 | 3187 | 916    | 0.0000   |
| A4F0GL                      | 0.8266 | 0.0515 | 0.7471  | 0.9144  | 0.0002 | 0.2996 | 0.2321 | 3187 | 916    | 0.0022   |
| A4FGE                       | 1.0781 | 0.1076 | 0.8731  | 1.3311  | 0.4847 | 0.8372 | 0.0132 | 3187 | 916    | 0.6816   |
| A4FGL                       | 0.8874 | 0.0996 | 0.7300  | 1.0787  | 0.2303 | 0.8087 | 0.0222 | 3187 | 916    | 0.3701   |
| A4FGS                       | 0.8943 | 0.0427 | 0.8226  | 0.9723  | 0.0088 | 0.0000 | 0.5527 | 3187 | 916    | 0.0397   |
| A4L                         | 0.8222 | 0.0637 | 0.7257  | 0.9315  | 0.0021 | 0.5266 | 0.1461 | 3187 | 916    | 0.0125   |
| A4S                         | 0.9290 | 0.0571 | 0.8306  | 1.0391  | 0.1974 | 0.4322 | 0.1845 | 3187 | 916    | 0.3417   |
| CA2                         | 0.9171 | 0.0434 | 0.8423  | 0.9986  | 0.0464 | 0.0000 | 0.7137 | 3187 | 916    | 0.1043   |
| CA3                         | 1.0931 | 0.0437 | 1.0034  | 1.1907  | 0.0415 | 0.0000 | 0.7853 | 3187 | 916    | 0.1037   |
| MHy                         | 1.0130 | 0.0438 | 0.9296  | 1.1038  | 0.7689 | 0.0000 | 0.5426 | 3187 | 916    | 0.9032   |
| MM                          | 0.9834 | 0.0417 | 0.9062  | 1.0673  | 0.6891 | 0.0000 | 0.4099 | 3187 | 916    | 0.8859   |
| TA2FS0                      | 0.9125 | 0.0433 | 0.8383  | 0.9933  | 0.0344 | 0.0000 | 0.9959 | 3187 | 916    | 0.0910   |

**Supplementary Table 6. Meta analysed associations between derived glycan traits and cardiovascular disease in type 2 diabetes in the basic model. Glycan values are centered and scaled. The *p*-values after FDR correction that are significant ( $\leq 0.05$ ) are highlighted in green. Red represents a positive association and blue a negative association. Basic model: age, sex and the interaction thereof.**

| Incident (Cox) |        |        |         |         |        |        |        |      |        |          |
|----------------|--------|--------|---------|---------|--------|--------|--------|------|--------|----------|
| glycome        | HR     | SE     | CIlower | CIupper | pval   | I2     | I2pval | n    | nevent | pval.FDR |
| A2E            | 1.1656 | 0.1648 | 0.8439  | 1.6101  | 0.3523 | 0.7876 | 0.0300 | 2254 | 201    | 0.7179   |
| A2E0F          | 0.9380 | 0.0714 | 0.8156  | 1.0789  | 0.3704 | 0.0000 | 0.3523 | 2254 | 201    | 0.7179   |
| A2EF           | 0.9894 | 0.0699 | 0.8627  | 1.1346  | 0.8784 | 0.0000 | 0.8879 | 2254 | 201    | 0.9469   |
| A2F            | 0.9475 | 0.0727 | 0.8217  | 1.0926  | 0.4582 | 0.0000 | 0.6274 | 2254 | 201    | 0.7364   |
| A2F0G          | 1.1315 | 0.0782 | 0.9708  | 1.3188  | 0.1140 | 0.0000 | 0.5023 | 2254 | 201    | 0.6264   |
| A2F0GE         | 1.0665 | 0.0930 | 0.8888  | 1.2797  | 0.4890 | 0.3775 | 0.2050 | 2254 | 201    | 0.7516   |
| A2F0GL         | 0.9560 | 0.0728 | 0.8288  | 1.1027  | 0.5364 | 0.0000 | 0.9739 | 2254 | 201    | 0.7516   |
| A2F0GS         | 1.0429 | 0.1094 | 0.8416  | 1.2924  | 0.7011 | 0.5594 | 0.1319 | 2254 | 201    | 0.8303   |
| A2F0S0B        | 0.9375 | 0.0781 | 0.8045  | 1.0926  | 0.4088 | 0.1303 | 0.2836 | 2254 | 201    | 0.7179   |
| A2F0S0G        | 1.0954 | 0.0728 | 0.9497  | 1.2633  | 0.2109 | 0.0000 | 0.5852 | 2254 | 201    | 0.6264   |
| A2F0SB         | 0.9419 | 0.0760 | 0.8115  | 1.0932  | 0.4307 | 0.0000 | 0.3863 | 2254 | 201    | 0.7179   |
| A2FG           | 1.0586 | 0.0955 | 0.8779  | 1.2765  | 0.5510 | 0.3640 | 0.2099 | 2254 | 201    | 0.7516   |
| A2FGE          | 1.1404 | 0.1508 | 0.8485  | 1.5326  | 0.3837 | 0.7688 | 0.0375 | 2254 | 201    | 0.7179   |
| A2FGL          | 1.1071 | 0.0705 | 0.9643  | 1.2711  | 0.1488 | 0.0000 | 0.7981 | 2254 | 201    | 0.6264   |
| A2FGS          | 1.2037 | 0.1452 | 0.9056  | 1.6000  | 0.2016 | 0.7447 | 0.0478 | 2254 | 201    | 0.6264   |
| A2FS0B         | 1.0119 | 0.1593 | 0.7405  | 1.3829  | 0.9406 | 0.7909 | 0.0288 | 2254 | 201    | 0.9469   |
| A2FS0G         | 0.8934 | 0.0816 | 0.7613  | 1.0484  | 0.1674 | 0.0000 | 0.6576 | 2254 | 201    | 0.6264   |
| A2FSB          | 0.9332 | 0.0740 | 0.8073  | 1.0788  | 0.3501 | 0.0000 | 0.4234 | 2254 | 201    | 0.7179   |
| A2FSG          | 1.1744 | 0.1056 | 0.9548  | 1.4445  | 0.1281 | 0.4624 | 0.1726 | 2254 | 201    | 0.6264   |
| A2GS           | 1.1708 | 0.1502 | 0.8722  | 1.5715  | 0.2938 | 0.7467 | 0.0469 | 2254 | 201    | 0.7179   |
| A2L            | 1.0332 | 0.0715 | 0.8982  | 1.1886  | 0.6476 | 0.0000 | 0.5183 | 2254 | 201    | 0.8079   |
| A2L0F          | 0.9365 | 0.0725 | 0.8125  | 1.0795  | 0.3653 | 0.0000 | 0.7313 | 2254 | 201    | 0.7179   |
| A2LF           | 1.0917 | 0.0951 | 0.9061  | 1.3155  | 0.3560 | 0.3808 | 0.2038 | 2254 | 201    | 0.7179   |
| A2S0F          | 0.9563 | 0.0704 | 0.8330  | 1.0978  | 0.5253 | 0.0000 | 0.4107 | 2254 | 201    | 0.7516   |
| A2SG           | 1.1079 | 0.0791 | 0.9487  | 1.2938  | 0.1954 | 0.0000 | 0.5048 | 2254 | 201    | 0.6264   |
| A3E            | 1.1436 | 0.1134 | 0.9157  | 1.4281  | 0.2366 | 0.5981 | 0.1147 | 2254 | 201    | 0.6264   |
| A3F            | 1.0136 | 0.1944 | 0.6925  | 1.4835  | 0.9448 | 0.8526 | 0.0092 | 2254 | 201    | 0.9469   |
| A3L            | 0.8819 | 0.0706 | 0.7680  | 1.0128  | 0.0752 | 0.0000 | 0.4713 | 2254 | 201    | 0.6264   |
| A3L0F          | 0.9134 | 0.1520 | 0.6780  | 1.2304  | 0.5511 | 0.7491 | 0.0459 | 2254 | 201    | 0.7516   |
| A3LF           | 1.0219 | 0.1757 | 0.7241  | 1.4420  | 0.9020 | 0.8229 | 0.0175 | 2254 | 201    | 0.9469   |
| A3S            | 0.9628 | 0.0706 | 0.8384  | 1.1057  | 0.5911 | 0.0000 | 0.4181 | 2254 | 201    | 0.7823   |
| A4E            | 1.1864 | 0.0947 | 0.9855  | 1.4283  | 0.0710 | 0.4400 | 0.1814 | 2254 | 201    | 0.6264   |
| A4F            | 0.9860 | 0.2121 | 0.6507  | 1.4941  | 0.9469 | 0.8765 | 0.0044 | 2254 | 201    | 0.9469   |
| A4F0GE         | 1.1717 | 0.0705 | 1.0206  | 1.3453  | 0.0245 | 0.0000 | 0.3555 | 2254 | 201    | 0.3677   |
| A4F0GL         | 0.8511 | 0.0714 | 0.7400  | 0.9789  | 0.0239 | 0.0000 | 0.9140 | 2254 | 201    | 0.3677   |
| A4FGE          | 1.0869 | 0.1025 | 0.8890  | 1.3288  | 0.4164 | 0.5125 | 0.1521 | 2254 | 201    | 0.7179   |
| A4FGL          | 0.8905 | 0.0714 | 0.7742  | 1.0244  | 0.1046 | 0.0000 | 0.3594 | 2254 | 201    | 0.6264   |
| A4FGS          | 0.9059 | 0.0718 | 0.7870  | 1.0429  | 0.1690 | 0.0000 | 0.8752 | 2254 | 201    | 0.6264   |
| A4L            | 0.8254 | 0.0721 | 0.7166  | 0.9508  | 0.0078 | 0.0000 | 0.4179 | 2254 | 201    | 0.3526   |
| A4S            | 0.8924 | 0.0723 | 0.7744  | 1.0283  | 0.1155 | 0.0000 | 0.4271 | 2254 | 201    | 0.6264   |
| CA2            | 0.9842 | 0.0921 | 0.8217  | 1.1789  | 0.8631 | 0.3686 | 0.2082 | 2254 | 201    | 0.9469   |
| CA3            | 1.0414 | 0.0935 | 0.8670  | 1.2509  | 0.6643 | 0.3944 | 0.1988 | 2254 | 201    | 0.8079   |
| MHy            | 0.9948 | 0.0742 | 0.8601  | 1.1505  | 0.9435 | 0.0000 | 0.4966 | 2254 | 201    | 0.9469   |
| MM             | 1.1161 | 0.2346 | 0.7048  | 1.7676  | 0.6395 | 0.9066 | 0.0011 | 2254 | 201    | 0.8079   |
| TA2FS0         | 0.8809 | 0.1065 | 0.7149  | 1.0854  | 0.2339 | 0.4520 | 0.1767 | 2254 | 201    | 0.6264   |

**Supplementary Table 7. Meta analysed associations between derived glycan traits and cardiovascular disease in type 2 diabetes in the full model. Glycan values are centered and scaled. The *p*-values after FDR correction that are significant ( $\leq 0.05$ ) are highlighted in green. Red represents a positive association and blue a negative association. Full model: age, sex, the interaction thereof, BMI, HDL, non-HDL, duration of diabetes, eGFR and HbA1c.**

| glycome | Prevalent (cross-sectional) |        |         |         |        |        |        |      |        |         |
|---------|-----------------------------|--------|---------|---------|--------|--------|--------|------|--------|---------|
|         | OR                          | SE     | C lower | C upper | pval   | I2     | I2pval | n    | nevent | pvalFDR |
| A2E     | 1.0513                      | 0.0437 | 0.9650  | 1.1454  | 0.2525 | 0.0000 | 0.7037 | 3187 | 916    | 0.5345  |
| A2E0F   | 0.8603                      | 0.0434 | 0.7901  | 0.9367  | 0.0005 | 0.0000 | 0.9526 | 3187 | 916    | 0.0059  |
| A2EF    | 0.9240                      | 0.0436 | 0.8483  | 1.0065  | 0.0700 | 0.0000 | 0.9937 | 3187 | 916    | 0.2566  |
| A2F     | 0.9239                      | 0.0434 | 0.8486  | 1.0058  | 0.0679 | 0.0000 | 0.8748 | 3187 | 916    | 0.2566  |
| A2F0G   | 0.9663                      | 0.0426 | 0.8889  | 1.0505  | 0.4213 | 0.0000 | 0.5009 | 3187 | 916    | 0.6997  |
| A2F0GE  | 0.9939                      | 0.0447 | 0.9105  | 1.0849  | 0.8911 | 0.0000 | 0.8753 | 3187 | 916    | 0.9548  |
| A2F0GL  | 0.9886                      | 0.0512 | 0.8941  | 1.0930  | 0.8223 | 0.2189 | 0.2579 | 3187 | 916    | 0.9251  |
| A2F0GS  | 0.9791                      | 0.0440 | 0.8982  | 1.0674  | 0.6318 | 0.0000 | 0.6116 | 3187 | 916    | 0.8123  |
| A2F0S0B | 1.0930                      | 0.0591 | 0.9735  | 1.2272  | 0.1321 | 0.4288 | 0.1858 | 3187 | 916    | 0.3526  |
| A2F0S0G | 0.9666                      | 0.0436 | 0.8874  | 1.0528  | 0.4354 | 0.0000 | 0.5780 | 3187 | 916    | 0.6997  |
| A2F0SB  | 1.0009                      | 0.0423 | 0.9212  | 1.0874  | 0.9835 | 0.0000 | 0.7371 | 3187 | 916    | 0.9835  |
| A2FG    | 1.0076                      | 0.0447 | 0.9231  | 1.0999  | 0.8652 | 0.0000 | 0.9940 | 3187 | 916    | 0.9496  |
| A2FGE   | 1.0233                      | 0.0448 | 0.9372  | 1.1173  | 0.6068 | 0.0000 | 0.5005 | 3187 | 916    | 0.8123  |
| A2FGL   | 1.1103                      | 0.0697 | 0.9686  | 1.2728  | 0.1332 | 0.5656 | 0.1292 | 3187 | 916    | 0.3526  |
| A2FGS   | 1.0829                      | 0.0446 | 0.9923  | 1.1818  | 0.0741 | 0.0000 | 0.8579 | 3187 | 916    | 0.2566  |
| A2FS0B  | 1.3275                      | 0.0463 | 1.2122  | 1.4537  | 0.0000 | 0.0000 | 0.8541 | 3187 | 916    | 0.0000  |
| A2FS0G  | 0.9319                      | 0.0493 | 0.8462  | 1.0264  | 0.1525 | 0.0000 | 0.7556 | 3187 | 916    | 0.3813  |
| A2FSB   | 1.0196                      | 0.0483 | 0.9276  | 1.1208  | 0.6875 | 0.1796 | 0.2696 | 3187 | 916    | 0.8594  |
| A2FSG   | 1.0029                      | 0.0435 | 0.9209  | 1.0922  | 0.9470 | 0.0000 | 0.4107 | 3187 | 916    | 0.9685  |
| A2GS    | 1.0598                      | 0.0439 | 0.9724  | 1.1551  | 0.1862 | 0.0000 | 0.7982 | 3187 | 916    | 0.4411  |
| A2L     | 1.0520                      | 0.0451 | 0.9630  | 1.1492  | 0.2613 | 0.0000 | 0.8491 | 3187 | 916    | 0.5345  |
| A2L0F   | 0.9171                      | 0.0435 | 0.8422  | 0.9988  | 0.0468 | 0.0000 | 0.8866 | 3187 | 916    | 0.2566  |
| A2LF    | 1.0093                      | 0.1210 | 0.7961  | 1.2795  | 0.9393 | 0.8562 | 0.0084 | 3187 | 916    | 0.9685  |
| A2S0F   | 0.8853                      | 0.0423 | 0.8149  | 0.9618  | 0.0040 | 0.0000 | 0.9962 | 3187 | 916    | 0.0297  |
| A2SG    | 1.0510                      | 0.0428 | 0.9664  | 1.1430  | 0.2453 | 0.0000 | 0.5649 | 3187 | 916    | 0.5345  |
| A3E     | 1.0782                      | 0.0472 | 0.9829  | 1.1827  | 0.1108 | 0.0000 | 0.7343 | 3187 | 916    | 0.3325  |
| A3F     | 0.9400                      | 0.1237 | 0.7377  | 1.1979  | 0.6171 | 0.8581 | 0.0079 | 3187 | 916    | 0.8123  |
| A3L     | 0.9171                      | 0.0451 | 0.8395  | 1.0018  | 0.0549 | 0.0000 | 0.3582 | 3187 | 916    | 0.2566  |
| A3L0F   | 0.8778                      | 0.1274 | 0.6837  | 1.1268  | 0.3063 | 0.8605 | 0.0074 | 3187 | 916    | 0.5566  |
| A3LF    | 0.9561                      | 0.1209 | 0.7543  | 1.2118  | 0.7103 | 0.8533 | 0.0090 | 3187 | 916    | 0.8638  |
| A3S     | 0.9575                      | 0.0425 | 0.8810  | 1.0408  | 0.3075 | 0.0000 | 0.5476 | 3187 | 916    | 0.5566  |
| A4E     | 1.1803                      | 0.0449 | 1.0809  | 1.2888  | 0.0002 | 0.0000 | 0.3946 | 3187 | 916    | 0.0033  |
| A4F     | 0.9694                      | 0.1190 | 0.7677  | 1.2242  | 0.7941 | 0.8471 | 0.0106 | 3187 | 916    | 0.9162  |
| A4F0GE  | 1.1955                      | 0.0443 | 1.0961  | 1.3040  | 0.0001 | 0.0000 | 0.8833 | 3187 | 916    | 0.0012  |
| A4F0GL  | 0.8670                      | 0.0449 | 0.7939  | 0.9469  | 0.0015 | 0.0000 | 0.3540 | 3187 | 916    | 0.0135  |
| A4FGE   | 1.0386                      | 0.1136 | 0.8313  | 1.2977  | 0.7385 | 0.8401 | 0.0124 | 3187 | 916    | 0.8746  |
| A4FGL   | 0.9268                      | 0.1048 | 0.7547  | 1.1382  | 0.4686 | 0.8080 | 0.0225 | 3187 | 916    | 0.7271  |
| A4FGS   | 0.9231                      | 0.0443 | 0.8464  | 1.0068  | 0.0708 | 0.0000 | 0.4855 | 3187 | 916    | 0.2566  |
| A4L     | 0.8618                      | 0.0534 | 0.7762  | 0.9569  | 0.0053 | 0.2456 | 0.2496 | 3187 | 916    | 0.0343  |
| A4S     | 0.9705                      | 0.0510 | 0.8782  | 1.0726  | 0.5576 | 0.2405 | 0.2512 | 3187 | 916    | 0.7853  |
| CA2     | 0.9569                      | 0.0449 | 0.8762  | 1.0449  | 0.3263 | 0.0000 | 0.4668 | 3187 | 916    | 0.5648  |
| CA3     | 1.0471                      | 0.0453 | 0.9582  | 1.1443  | 0.3092 | 0.0000 | 0.5185 | 3187 | 916    | 0.5566  |
| MHy     | 1.0268                      | 0.0453 | 0.9397  | 1.1221  | 0.5585 | 0.0000 | 0.3827 | 3187 | 916    | 0.7853  |
| MM      | 0.9721                      | 0.0429 | 0.8937  | 1.0573  | 0.5087 | 0.0000 | 0.7026 | 3187 | 916    | 0.7631  |
| TA2FS0  | 0.9285                      | 0.0439 | 0.8520  | 1.0120  | 0.0913 | 0.0000 | 0.7557 | 3187 | 916    | 0.2934  |

**Supplementary Table 7. Meta analysed associations between derived glycan traits and cardiovascular disease in type 2 diabetes in the full model. Glycan values are centered and scaled. The *p*-values after FDR correction that are significant ( $\leq 0.05$ ) are highlighted in green. Red represents a positive association and blue a negative association. Full model: age, sex, the interaction thereof, BMI, HDL, non-HDL, duration of diabetes, eGFR and HbA1c.**

| glycome | Incident (Cox) |        |         |         |        |        |        |      |        |          |
|---------|----------------|--------|---------|---------|--------|--------|--------|------|--------|----------|
|         | HR             | SE     | CIlower | CIupper | pval   | I2     | I2pval | n    | nevent | pval.FDR |
| A2E     | 1.1846         | 0.1654 | 0.8567  | 1.6381  | 0.3055 | 0.7729 | 0.0359 | 2254 | 201    | 0.6043   |
| A2E0F   | 0.9525         | 0.0851 | 0.8062  | 1.1253  | 0.5671 | 0.2543 | 0.2468 | 2254 | 201    | 0.8004   |
| A2EF    | 0.9647         | 0.0731 | 0.8359  | 1.1132  | 0.6226 | 0.0000 | 0.7950 | 2254 | 201    | 0.8004   |
| A2F     | 0.9298         | 0.0745 | 0.8034  | 1.0761  | 0.3288 | 0.0000 | 0.6407 | 2254 | 201    | 0.6043   |
| A2F0G   | 1.1434         | 0.0795 | 0.9784  | 1.3362  | 0.0920 | 0.0000 | 0.4506 | 2254 | 201    | 0.5913   |
| A2F0GE  | 1.0858         | 0.0762 | 0.9352  | 1.2608  | 0.2800 | 0.0068 | 0.3157 | 2254 | 201    | 0.6043   |
| A2F0GL  | 0.9374         | 0.0754 | 0.8086  | 1.0866  | 0.3910 | 0.0000 | 0.8900 | 2254 | 201    | 0.6516   |
| A2F0GS  | 1.0543         | 0.0992 | 0.8679  | 1.2806  | 0.5944 | 0.4184 | 0.1898 | 2254 | 201    | 0.8004   |
| A2F0S0B | 0.9229         | 0.0734 | 0.7992  | 1.0656  | 0.2741 | 0.0000 | 0.3292 | 2254 | 201    | 0.6043   |
| A2F0S0G | 1.1048         | 0.0734 | 0.9568  | 1.2757  | 0.1746 | 0.0000 | 0.4900 | 2254 | 201    | 0.6043   |
| A2F0SB  | 0.9338         | 0.0861 | 0.7887  | 1.1056  | 0.4267 | 0.1935 | 0.2655 | 2254 | 201    | 0.6621   |
| A2FG    | 1.0359         | 0.1234 | 0.8134  | 1.3194  | 0.7748 | 0.6054 | 0.1114 | 2254 | 201    | 0.8953   |
| A2FGE   | 1.1391         | 0.1631 | 0.8275  | 1.5680  | 0.4246 | 0.7760 | 0.0346 | 2254 | 201    | 0.6621   |
| A2FGL   | 1.0777         | 0.0743 | 0.9317  | 1.2465  | 0.3139 | 0.0000 | 0.9415 | 2254 | 201    | 0.6043   |
| A2FGS   | 1.1811         | 0.1634 | 0.8575  | 1.6269  | 0.3082 | 0.7773 | 0.0341 | 2254 | 201    | 0.6043   |
| A2FS0B  | 0.9776         | 0.1838 | 0.6819  | 1.4016  | 0.9020 | 0.8233 | 0.0173 | 2254 | 201    | 0.9225   |
| A2FS0G  | 0.8965         | 0.0839 | 0.7605  | 1.0568  | 0.1930 | 0.0000 | 0.4744 | 2254 | 201    | 0.6043   |
| A2FSB   | 0.9230         | 0.0745 | 0.7976  | 1.0683  | 0.2827 | 0.0000 | 0.3339 | 2254 | 201    | 0.6043   |
| A2FSG   | 1.1357         | 0.1359 | 0.8701  | 1.4823  | 0.3491 | 0.6696 | 0.0819 | 2254 | 201    | 0.6043   |
| A2GS    | 1.1741         | 0.1473 | 0.8798  | 1.5670  | 0.2757 | 0.7218 | 0.0580 | 2254 | 201    | 0.6043   |
| A2L     | 0.9863         | 0.0759 | 0.8499  | 1.1445  | 0.8555 | 0.0000 | 0.7671 | 2254 | 201    | 0.8953   |
| A2L0F   | 0.9253         | 0.0744 | 0.7997  | 1.0707  | 0.2972 | 0.0000 | 0.7070 | 2254 | 201    | 0.6043   |
| A2LF    | 1.0313         | 0.0756 | 0.8893  | 1.1961  | 0.6834 | 0.0000 | 0.3699 | 2254 | 201    | 0.8398   |
| A2S0F   | 0.9599         | 0.0726 | 0.8326  | 1.1066  | 0.5724 | 0.0000 | 0.3520 | 2254 | 201    | 0.8004   |
| A2SG    | 1.1106         | 0.0805 | 0.9485  | 1.3004  | 0.1924 | 0.0000 | 0.3652 | 2254 | 201    | 0.6043   |
| A3E     | 1.1767         | 0.1354 | 0.9025  | 1.5342  | 0.2294 | 0.6575 | 0.0875 | 2254 | 201    | 0.6043   |
| A3F     | 0.9561         | 0.1696 | 0.6856  | 1.3331  | 0.7911 | 0.7997 | 0.0255 | 2254 | 201    | 0.8953   |
| A3L     | 0.8620         | 0.0755 | 0.7435  | 0.9995  | 0.0492 | 0.0000 | 0.4711 | 2254 | 201    | 0.5536   |
| A3L0F   | 0.8698         | 0.1410 | 0.6598  | 1.1468  | 0.3228 | 0.6914 | 0.0719 | 2254 | 201    | 0.6043   |
| A3LF    | 0.9674         | 0.1523 | 0.7177  | 1.3039  | 0.8277 | 0.7559 | 0.0430 | 2254 | 201    | 0.8953   |
| A3S     | 0.9587         | 0.0715 | 0.8332  | 1.1030  | 0.5551 | 0.0000 | 0.3851 | 2254 | 201    | 0.8004   |
| A4E     | 1.2070         | 0.1038 | 0.9848  | 1.4792  | 0.0699 | 0.5053 | 0.1551 | 2254 | 201    | 0.5913   |
| A4F     | 0.9268         | 0.1910 | 0.6374  | 1.3475  | 0.6905 | 0.8426 | 0.0117 | 2254 | 201    | 0.8398   |
| A4F0GE  | 1.1675         | 0.0771 | 1.0037  | 1.3580  | 0.0446 | 0.1407 | 0.2807 | 2254 | 201    | 0.5536   |
| A4F0GL  | 0.8517         | 0.0737 | 0.7371  | 0.9841  | 0.0294 | 0.0000 | 0.7723 | 2254 | 201    | 0.5536   |
| A4FGE   | 1.1066         | 0.0983 | 0.9127  | 1.3417  | 0.3027 | 0.4309 | 0.1850 | 2254 | 201    | 0.6043   |
| A4FGL   | 0.8805         | 0.0742 | 0.7613  | 1.0184  | 0.0864 | 0.0000 | 0.3376 | 2254 | 201    | 0.5913   |
| A4FGS   | 0.9157         | 0.0734 | 0.7930  | 1.0575  | 0.2305 | 0.0000 | 0.7199 | 2254 | 201    | 0.6043   |
| A4L     | 0.8043         | 0.0778 | 0.6906  | 0.9368  | 0.0051 | 0.0318 | 0.3095 | 2254 | 201    | 0.2305   |
| A4S     | 0.8859         | 0.0754 | 0.7642  | 1.0270  | 0.1080 | 0.0000 | 0.4167 | 2254 | 201    | 0.6043   |
| CA2     | 1.0031         | 0.1160 | 0.7990  | 1.2592  | 0.9790 | 0.5877 | 0.1194 | 2254 | 201    | 0.9790   |
| CA3     | 1.0221         | 0.1156 | 0.8149  | 1.2820  | 0.8498 | 0.5893 | 0.1187 | 2254 | 201    | 0.8953   |
| MHy     | 1.0150         | 0.0740 | 0.8780  | 1.1735  | 0.8403 | 0.0000 | 0.6956 | 2254 | 201    | 0.8953   |
| MM      | 1.1236         | 0.2326 | 0.7122  | 1.7726  | 0.6163 | 0.9062 | 0.0011 | 2254 | 201    | 0.8004   |
| TA2FS0  | 0.8888         | 0.1231 | 0.6983  | 1.1314  | 0.3384 | 0.5710 | 0.1268 | 2254 | 201    | 0.6043   |

**Supplementary Table 8. Meta analysed associations between derived glycan traits and nephropathy in type 2 diabetes in the basic model. Glycan values are centered and scaled. The *p*-values after FDR correction that are significant ( $\leq 0.05$ ) are highlighted in green. Red represents a positive association and blue a negative association. Basic model: age, sex and the interaction thereof.**

| glycome | Prevalent (cross-sectional) |        |         |         |        |        |        |      |        |          |
|---------|-----------------------------|--------|---------|---------|--------|--------|--------|------|--------|----------|
|         | OR                          | SE     | CIlower | CIupper | pval   | I2     | I2pval | n    | nevent | pval.FDR |
| A2E     | 1.0984                      | 0.0920 | 0.9171  | 1.3155  | 0.3077 | 0.7281 | 0.0552 | 3139 | 603    | 0.5273   |
| A2E0F   | 0.9545                      | 0.0467 | 0.8710  | 1.0460  | 0.3187 | 0.0000 | 0.9290 | 3139 | 603    | 0.5273   |
| A2EF    | 0.9809                      | 0.1089 | 0.7923  | 1.2144  | 0.8595 | 0.8159 | 0.0198 | 3139 | 603    | 0.9540   |
| A2F     | 0.9580                      | 0.0967 | 0.7925  | 1.1580  | 0.6572 | 0.7617 | 0.0405 | 3139 | 603    | 0.8215   |
| A2F0G   | 1.0007                      | 0.0580 | 0.8931  | 1.1212  | 0.9910 | 0.3483 | 0.2154 | 3139 | 603    | 0.9910   |
| A2F0GE  | 1.0682                      | 0.0952 | 0.8864  | 1.2873  | 0.4884 | 0.7394 | 0.0501 | 3139 | 603    | 0.7089   |
| A2F0GL  | 0.8551                      | 0.0487 | 0.7772  | 0.9408  | 0.0013 | 0.0000 | 0.5169 | 3139 | 603    | 0.0084   |
| A2F0GS  | 1.0132                      | 0.0796 | 0.8669  | 1.1842  | 0.8692 | 0.6293 | 0.1005 | 3139 | 603    | 0.9540   |
| A2F0S0B | 1.1525                      | 0.0474 | 1.0503  | 1.2648  | 0.0027 | 0.0000 | 0.6801 | 3139 | 603    | 0.0137   |
| A2F0S0G | 0.8981                      | 0.0472 | 0.8187  | 0.9852  | 0.0228 | 0.0000 | 0.7570 | 3139 | 603    | 0.0642   |
| A2F0SB  | 1.0044                      | 0.0500 | 0.9106  | 1.1078  | 0.9303 | 0.1419 | 0.2804 | 3139 | 603    | 0.9702   |
| A2FG    | 0.9566                      | 0.0481 | 0.8705  | 1.0513  | 0.3567 | 0.0000 | 0.6842 | 3139 | 603    | 0.5536   |
| A2FGE   | 1.1818                      | 0.0473 | 1.0771  | 1.2967  | 0.0004 | 0.0000 | 0.4080 | 3139 | 603    | 0.0038   |
| A2FGL   | 1.0409                      | 0.0663 | 0.9141  | 1.1853  | 0.5451 | 0.4794 | 0.1657 | 3139 | 603    | 0.7665   |
| A2FGS   | 1.2139                      | 0.0482 | 1.1044  | 1.3343  | 0.0001 | 0.0000 | 0.8468 | 3139 | 603    | 0.0012   |
| A2FS0B  | 1.1772                      | 0.0482 | 1.0711  | 1.2939  | 0.0007 | 0.0000 | 0.6833 | 3139 | 603    | 0.0054   |
| A2FS0G  | 0.8219                      | 0.0525 | 0.7415  | 0.9109  | 0.0002 | 0.0000 | 0.9775 | 3139 | 603    | 0.0021   |
| A2FSB   | 1.0222                      | 0.1240 | 0.8017  | 1.3035  | 0.8593 | 0.8507 | 0.0096 | 3139 | 603    | 0.9540   |
| A2FSG   | 1.0112                      | 0.0478 | 0.9207  | 1.1106  | 0.8159 | 0.0000 | 0.5781 | 3139 | 603    | 0.9540   |
| A2GS    | 1.1174                      | 0.0921 | 0.9328  | 1.3384  | 0.2283 | 0.7230 | 0.0574 | 3139 | 603    | 0.4466   |
| A2L     | 0.8838                      | 0.0482 | 0.8041  | 0.9714  | 0.0104 | 0.0000 | 0.7885 | 3139 | 603    | 0.0389   |
| A2L0F   | 0.9555                      | 0.0973 | 0.7897  | 1.1562  | 0.6398 | 0.7638 | 0.0396 | 3139 | 603    | 0.8215   |
| A2LF    | 1.0633                      | 0.0531 | 0.9581  | 1.1800  | 0.2484 | 0.2003 | 0.2635 | 3139 | 603    | 0.4471   |
| A2S0F   | 0.9415                      | 0.0457 | 0.8608  | 1.0298  | 0.1874 | 0.0000 | 0.7008 | 3139 | 603    | 0.3833   |
| A2SG    | 1.0074                      | 0.0761 | 0.8678  | 1.1694  | 0.9231 | 0.6433 | 0.0941 | 3139 | 603    | 0.9702   |
| A3E     | 1.2795                      | 0.0475 | 1.1657  | 1.4044  | 0.0000 | 0.0000 | 0.4733 | 3139 | 603    | 0.0000   |
| A3F     | 1.0089                      | 0.0508 | 0.9132  | 1.1147  | 0.8609 | 0.0996 | 0.2920 | 3139 | 603    | 0.9540   |
| A3L     | 0.8649                      | 0.0466 | 0.7894  | 0.9476  | 0.0018 | 0.0000 | 0.4079 | 3139 | 603    | 0.0104   |
| A3L0F   | 0.9383                      | 0.0481 | 0.8539  | 1.0311  | 0.1858 | 0.0000 | 0.6205 | 3139 | 603    | 0.3833   |
| A3LF    | 1.0272                      | 0.0540 | 0.9241  | 1.1418  | 0.6191 | 0.2014 | 0.2631 | 3139 | 603    | 0.8193   |
| A3S     | 1.0564                      | 0.0470 | 0.9634  | 1.1584  | 0.2435 | 0.0000 | 0.8136 | 3139 | 603    | 0.4471   |
| A4E     | 1.0888                      | 0.0870 | 0.9181  | 1.2911  | 0.3281 | 0.7004 | 0.0677 | 3139 | 603    | 0.5273   |
| A4F     | 1.0031                      | 0.0483 | 0.9125  | 1.1028  | 0.9486 | 0.0000 | 0.4609 | 3139 | 603    | 0.9702   |
| A4F0GE  | 1.0592                      | 0.1052 | 0.8618  | 1.3018  | 0.5845 | 0.7976 | 0.0262 | 3139 | 603    | 0.7970   |
| A4F0GL  | 0.8942                      | 0.0665 | 0.7850  | 1.0186  | 0.0924 | 0.4985 | 0.1579 | 3139 | 603    | 0.2310   |
| A4FGE   | 1.1188                      | 0.0462 | 1.0218  | 1.2249  | 0.0152 | 0.0000 | 0.8624 | 3139 | 603    | 0.0457   |
| A4FGL   | 0.8748                      | 0.0462 | 0.7991  | 0.9576  | 0.0038 | 0.0000 | 0.3539 | 3139 | 603    | 0.0154   |
| A4FGS   | 0.9117                      | 0.0618 | 0.8077  | 1.0292  | 0.1349 | 0.4106 | 0.1927 | 3139 | 603    | 0.3196   |
| A4L     | 0.8767                      | 0.0756 | 0.7559  | 1.0168  | 0.0819 | 0.6049 | 0.1116 | 3139 | 603    | 0.2167   |
| A4S     | 0.8715                      | 0.0471 | 0.7946  | 0.9558  | 0.0035 | 0.0000 | 0.6334 | 3139 | 603    | 0.0154   |
| CA2     | 0.8884                      | 0.0481 | 0.8084  | 0.9763  | 0.0140 | 0.0000 | 0.4361 | 3139 | 603    | 0.0457   |
| CA3     | 1.1245                      | 0.0483 | 1.0229  | 1.2363  | 0.0152 | 0.0000 | 0.3676 | 3139 | 603    | 0.0457   |
| MHy     | 0.8168                      | 0.0513 | 0.7387  | 0.9032  | 0.0001 | 0.0000 | 0.8161 | 3139 | 603    | 0.0012   |
| MM      | 1.0333                      | 0.0469 | 0.9426  | 1.1328  | 0.4844 | 0.0000 | 0.7396 | 3139 | 603    | 0.7089   |
| TA2FS0  | 0.9300                      | 0.0501 | 0.8430  | 1.0261  | 0.1481 | 0.0469 | 0.3057 | 3139 | 603    | 0.3332   |

**Supplementary Table 8. Meta analysed associations between derived glycan traits and nephropathy in type 2 diabetes in the basic model. Glycan values are centered and scaled. The *p*-values after FDR correction that are significant ( $\leq 0.05$ ) are highlighted in green. Red represents a positive association and blue a negative association. Basic model: age, sex and the interaction thereof.**

| glycome | Incident (Cox) |        |         |         |        |        |        |      |        |          |
|---------|----------------|--------|---------|---------|--------|--------|--------|------|--------|----------|
|         | HR             | SE     | CIlower | CIupper | pval   | I2     | I2pval | n    | nevent | pval.FDR |
| A2E     | 1.0488         | 0.0517 | 0.9477  | 1.1607  | 0.3566 | 0.0000 | 0.8910 | 2486 | 402    | 0.7294   |
| A2E0F   | 0.9853         | 0.0950 | 0.8180  | 1.1868  | 0.8760 | 0.6900 | 0.0725 | 2486 | 402    | 0.9615   |
| A2EF    | 1.0198         | 0.0623 | 0.9025  | 1.1522  | 0.7533 | 0.3041 | 0.2306 | 2486 | 402    | 0.9615   |
| A2F     | 0.9824         | 0.0538 | 0.8841  | 1.0917  | 0.7418 | 0.0559 | 0.3034 | 2486 | 402    | 0.9615   |
| A2F0G   | 0.9869         | 0.0511 | 0.8929  | 1.0909  | 0.7965 | 0.0000 | 0.4018 | 2486 | 402    | 0.9615   |
| A2F0GE  | 0.9858         | 0.0512 | 0.8917  | 1.0899  | 0.7800 | 0.0000 | 0.6138 | 2486 | 402    | 0.9615   |
| A2F0GL  | 0.9382         | 0.0516 | 0.8479  | 1.0380  | 0.2159 | 0.0000 | 0.9423 | 2486 | 402    | 0.6478   |
| A2F0GS  | 0.9437         | 0.0499 | 0.8559  | 1.0407  | 0.2456 | 0.0000 | 0.3492 | 2486 | 402    | 0.6502   |
| A2F0S0B | 1.1745         | 0.0923 | 0.9801  | 1.4074  | 0.0815 | 0.6799 | 0.0772 | 2486 | 402    | 0.2821   |
| A2F0S0G | 0.8778         | 0.0696 | 0.7659  | 1.0060  | 0.0610 | 0.4341 | 0.1837 | 2486 | 402    | 0.2286   |
| A2F0SB  | 1.0020         | 0.0509 | 0.9068  | 1.1071  | 0.9692 | 0.0000 | 0.7914 | 2486 | 402    | 0.9978   |
| A2FG    | 0.9574         | 0.0525 | 0.8637  | 1.0612  | 0.4068 | 0.0000 | 0.4419 | 2486 | 402    | 0.7959   |
| A2FGE   | 1.1533         | 0.0495 | 1.0467  | 1.2707  | 0.0040 | 0.0000 | 0.7485 | 2486 | 402    | 0.0593   |
| A2FGL   | 0.9985         | 0.0639 | 0.8810  | 1.1318  | 0.9814 | 0.3241 | 0.2239 | 2486 | 402    | 0.9978   |
| A2FGS   | 1.1692         | 0.0508 | 1.0584  | 1.2915  | 0.0021 | 0.0000 | 0.7823 | 2486 | 402    | 0.0469   |
| A2FS0B  | 1.1225         | 0.0611 | 0.9959  | 1.2652  | 0.0584 | 0.2527 | 0.2474 | 2486 | 402    | 0.2286   |
| A2FS0G  | 0.8115         | 0.0569 | 0.7258  | 0.9073  | 0.0002 | 0.0000 | 0.3501 | 2486 | 402    | 0.0110   |
| A2FSB   | 1.0565         | 0.0516 | 0.9548  | 1.1690  | 0.2870 | 0.0000 | 0.6031 | 2486 | 402    | 0.6798   |
| A2FSG   | 1.0287         | 0.0819 | 0.8761  | 1.2079  | 0.7294 | 0.5684 | 0.1280 | 2486 | 402    | 0.9615   |
| A2GS    | 1.0543         | 0.0516 | 0.9529  | 1.1665  | 0.3058 | 0.0000 | 0.7028 | 2486 | 402    | 0.6880   |
| A2L     | 0.9467         | 0.0513 | 0.8561  | 1.0468  | 0.2854 | 0.0000 | 0.9033 | 2486 | 402    | 0.6798   |
| A2L0F   | 0.9860         | 0.0521 | 0.8903  | 1.0920  | 0.7865 | 0.0000 | 0.3234 | 2486 | 402    | 0.9615   |
| A2LF    | 0.9964         | 0.0516 | 0.9006  | 1.1024  | 0.9445 | 0.0000 | 0.4485 | 2486 | 402    | 0.9978   |
| A2S0F   | 1.0164         | 0.0693 | 0.8874  | 1.1642  | 0.8138 | 0.4539 | 0.1760 | 2486 | 402    | 0.9615   |
| A2SG    | 0.9850         | 0.0537 | 0.8867  | 1.0943  | 0.7785 | 0.0000 | 0.5456 | 2486 | 402    | 0.9615   |
| A3E     | 1.0979         | 0.0605 | 0.9752  | 1.2361  | 0.1226 | 0.2751 | 0.2402 | 2486 | 402    | 0.3939   |
| A3F     | 0.9653         | 0.0529 | 0.8703  | 1.0708  | 0.5046 | 0.0000 | 0.6565 | 2486 | 402    | 0.8734   |
| A3L     | 0.8659         | 0.0633 | 0.7649  | 0.9802  | 0.0228 | 0.3449 | 0.2166 | 2486 | 402    | 0.1462   |
| A3L0F   | 0.9515         | 0.0529 | 0.8577  | 1.0556  | 0.3481 | 0.0000 | 0.3605 | 2486 | 402    | 0.7294   |
| A3LF    | 0.9839         | 0.0526 | 0.8875  | 1.0907  | 0.7571 | 0.0000 | 0.7801 | 2486 | 402    | 0.9615   |
| A3S     | 0.9096         | 0.0490 | 0.8264  | 1.0013  | 0.0531 | 0.0000 | 0.7406 | 2486 | 402    | 0.2286   |
| A4E     | 1.1152         | 0.0505 | 1.0101  | 1.2312  | 0.0308 | 0.0000 | 0.7563 | 2486 | 402    | 0.1541   |
| A4F     | 0.9629         | 0.0529 | 0.8681  | 1.0681  | 0.4748 | 0.0000 | 0.3849 | 2486 | 402    | 0.8546   |
| A4F0GE  | 1.1352         | 0.0503 | 1.0286  | 1.2528  | 0.0117 | 0.0000 | 0.4760 | 2486 | 402    | 0.0891   |
| A4F0GL  | 0.8798         | 0.0509 | 0.7962  | 0.9721  | 0.0119 | 0.0000 | 0.4399 | 2486 | 402    | 0.0891   |
| A4FGE   | 1.0522         | 0.0679 | 0.9211  | 1.2018  | 0.4537 | 0.4261 | 0.1868 | 2486 | 402    | 0.8507   |
| A4FGL   | 0.9792         | 0.0514 | 0.8853  | 1.0829  | 0.6820 | 0.0000 | 0.7045 | 2486 | 402    | 0.9615   |
| A4FGS   | 1.0094         | 0.0535 | 0.9090  | 1.1209  | 0.8613 | 0.0422 | 0.3069 | 2486 | 402    | 0.9615   |
| A4L     | 0.8909         | 0.0519 | 0.8047  | 0.9863  | 0.0260 | 0.0127 | 0.3142 | 2486 | 402    | 0.1462   |
| A4S     | 0.9462         | 0.0884 | 0.7956  | 1.1253  | 0.5316 | 0.6548 | 0.0888 | 2486 | 402    | 0.8860   |
| CA2     | 0.9866         | 0.0760 | 0.8500  | 1.1451  | 0.8588 | 0.5074 | 0.1542 | 2486 | 402    | 0.9615   |
| CA3     | 1.0002         | 0.0803 | 0.8546  | 1.1707  | 0.9978 | 0.5571 | 0.1329 | 2486 | 402    | 0.9978   |
| MHy     | 0.8686         | 0.0547 | 0.7803  | 0.9669  | 0.0100 | 0.0000 | 0.6262 | 2486 | 402    | 0.0891   |
| MM      | 1.0218         | 0.0495 | 0.9273  | 1.1259  | 0.6630 | 0.0000 | 0.9692 | 2486 | 402    | 0.9615   |
| TA2FS0  | 0.9379         | 0.0541 | 0.8436  | 1.0427  | 0.2357 | 0.0000 | 0.4758 | 2486 | 402    | 0.6502   |

**Supplementary Table 9. Meta analysed associations between derived glycan traits and nephropathy in type 2 diabetes in the full model. Glycan values are centered and scaled. The *p*-values after FDR correction that are significant ( $\leq 0.05$ ) are highlighted in green. Red represents a positive association and blue a negative association. Full model: age, sex, the interaction thereof, BMI, HDL, non-HDL, duration of diabetes, eGFR and HbA1c.**

| glycome | Prevalent (cross-sectional) |        |         |         |        |        |        |      |        |          |
|---------|-----------------------------|--------|---------|---------|--------|--------|--------|------|--------|----------|
|         | OR                          | SE     | Cllower | Clupper | pval   | I2     | I2pval | n    | nevent | pval.FDR |
| A2E     | 1.0234                      | 0.1063 | 0.8309  | 1.2605  | 0.8280 | 0.7749 | 0.0351 | 3139 | 603    | 0.9819   |
| A2E0F   | 1.0044                      | 0.0492 | 0.9120  | 1.1060  | 0.9294 | 0.0000 | 0.8278 | 3139 | 603    | 0.9819   |
| A2EF    | 0.9957                      | 0.1193 | 0.7881  | 1.2580  | 0.9712 | 0.8318 | 0.0148 | 3139 | 603    | 0.9819   |
| A2F     | 0.9959                      | 0.1105 | 0.8019  | 1.2369  | 0.9706 | 0.8007 | 0.0251 | 3139 | 603    | 0.9819   |
| A2F0G   | 0.9801                      | 0.0596 | 0.8721  | 1.1015  | 0.7355 | 0.3454 | 0.2165 | 3139 | 603    | 0.9819   |
| A2F0GE  | 1.0312                      | 0.1051 | 0.8393  | 1.2671  | 0.7699 | 0.7571 | 0.0425 | 3139 | 603    | 0.9819   |
| A2F0GL  | 0.9134                      | 0.0554 | 0.8195  | 1.0182  | 0.1022 | 0.1345 | 0.2824 | 3139 | 603    | 0.4601   |
| A2F0GS  | 1.0043                      | 0.0841 | 0.8516  | 1.1843  | 0.9594 | 0.6257 | 0.1022 | 3139 | 603    | 0.9819   |
| A2F0S0B | 1.1213                      | 0.0493 | 1.0180  | 1.2351  | 0.0202 | 0.0000 | 0.7033 | 3139 | 603    | 0.2276   |
| A2F0S0G | 0.9191                      | 0.0494 | 0.8342  | 1.0125  | 0.0876 | 0.0000 | 0.4074 | 3139 | 603    | 0.4601   |
| A2F0SB  | 1.0118                      | 0.0478 | 0.9214  | 1.1112  | 0.8056 | 0.0000 | 0.3335 | 3139 | 603    | 0.9819   |
| A2FG    | 0.9332                      | 0.0500 | 0.8460  | 1.0293  | 0.1670 | 0.0000 | 0.7904 | 3139 | 603    | 0.6612   |
| A2FGE   | 1.0960                      | 0.0507 | 0.9923  | 1.2106  | 0.0707 | 0.0000 | 0.3192 | 3139 | 603    | 0.4601   |
| A2FGL   | 1.0068                      | 0.0926 | 0.8396  | 1.2072  | 0.9418 | 0.6784 | 0.0778 | 3139 | 603    | 0.9819   |
| A2FGS   | 1.1078                      | 0.0510 | 1.0025  | 1.2242  | 0.0445 | 0.0000 | 0.8582 | 3139 | 603    | 0.4008   |
| A2FS0B  | 1.0725                      | 0.0518 | 0.9690  | 1.1871  | 0.1763 | 0.0000 | 0.8748 | 3139 | 603    | 0.6612   |
| A2FS0G  | 0.8692                      | 0.0552 | 0.7800  | 0.9686  | 0.0112 | 0.0000 | 0.9889 | 3139 | 603    | 0.1676   |
| A2FSB   | 1.0437                      | 0.1204 | 0.8243  | 1.3216  | 0.7224 | 0.8307 | 0.0151 | 3139 | 603    | 0.9819   |
| A2FSG   | 0.9769                      | 0.0497 | 0.8862  | 1.0768  | 0.6378 | 0.0000 | 0.8390 | 3139 | 603    | 0.9819   |
| A2GS    | 1.0486                      | 0.1002 | 0.8616  | 1.2761  | 0.6358 | 0.7388 | 0.0504 | 3139 | 603    | 0.9819   |
| A2L     | 0.9164                      | 0.0520 | 0.8277  | 1.0146  | 0.0928 | 0.0000 | 0.6536 | 3139 | 603    | 0.4601   |
| A2L0F   | 0.9974                      | 0.1135 | 0.7985  | 1.2459  | 0.9819 | 0.8093 | 0.0220 | 3139 | 603    | 0.9819   |
| A2LF    | 1.0118                      | 0.0501 | 0.9173  | 1.1162  | 0.8141 | 0.0000 | 0.5899 | 3139 | 603    | 0.9819   |
| A2S0F   | 0.9774                      | 0.0482 | 0.8893  | 1.0744  | 0.6363 | 0.0000 | 0.4474 | 3139 | 603    | 0.9819   |
| A2SG    | 0.9705                      | 0.0847 | 0.8221  | 1.1457  | 0.7238 | 0.6937 | 0.0708 | 3139 | 603    | 0.9819   |
| A3E     | 1.1677                      | 0.0527 | 1.0532  | 1.2947  | 0.0032 | 0.0000 | 0.6268 | 3139 | 603    | 0.1459   |
| A3F     | 0.9678                      | 0.0510 | 0.8757  | 1.0697  | 0.5216 | 0.0000 | 0.3814 | 3139 | 603    | 0.9819   |
| A3L     | 0.9571                      | 0.0505 | 0.8669  | 1.0568  | 0.3856 | 0.0000 | 0.3289 | 3139 | 603    | 0.9819   |
| A3L0F   | 0.9472                      | 0.0505 | 0.8579  | 1.0458  | 0.2828 | 0.0000 | 0.7073 | 3139 | 603    | 0.9089   |
| A3LF    | 0.9704                      | 0.0509 | 0.8782  | 1.0722  | 0.5547 | 0.0000 | 0.3798 | 3139 | 603    | 0.9819   |
| A3S     | 1.0864                      | 0.0492 | 0.9866  | 1.1964  | 0.0919 | 0.0000 | 0.4672 | 3139 | 603    | 0.4601   |
| A4E     | 1.0080                      | 0.0963 | 0.8346  | 1.2173  | 0.9343 | 0.7168 | 0.0602 | 3139 | 603    | 0.9819   |
| A4F     | 0.9600                      | 0.0513 | 0.8683  | 1.0615  | 0.4261 | 0.0000 | 0.5787 | 3139 | 603    | 0.9819   |
| A4F0GE  | 0.9801                      | 0.1065 | 0.7954  | 1.2076  | 0.8500 | 0.7740 | 0.0354 | 3139 | 603    | 0.9819   |
| A4F0GL  | 1.0023                      | 0.0828 | 0.8521  | 1.1789  | 0.9782 | 0.6202 | 0.1047 | 3139 | 603    | 0.9819   |
| A4FGE   | 1.0549                      | 0.0494 | 0.9576  | 1.1622  | 0.2791 | 0.0000 | 0.4470 | 3139 | 603    | 0.9089   |
| A4FGL   | 0.9496                      | 0.0720 | 0.8247  | 1.0935  | 0.4728 | 0.5100 | 0.1531 | 3139 | 603    | 0.9819   |
| A4FGS   | 0.9834                      | 0.0802 | 0.8403  | 1.1508  | 0.8344 | 0.6032 | 0.1124 | 3139 | 603    | 0.9819   |
| A4L     | 0.9745                      | 0.0883 | 0.8196  | 1.1586  | 0.7697 | 0.6564 | 0.0880 | 3139 | 603    | 0.9819   |
| A4S     | 0.9543                      | 0.0497 | 0.8657  | 1.0520  | 0.3472 | 0.0000 | 0.6704 | 3139 | 603    | 0.9819   |
| CA2     | 0.9336                      | 0.0784 | 0.8006  | 1.0887  | 0.3807 | 0.5724 | 0.1262 | 3139 | 603    | 0.9819   |
| CA3     | 1.0625                      | 0.0792 | 0.9097  | 1.2410  | 0.4440 | 0.5758 | 0.1247 | 3139 | 603    | 0.9819   |
| MHy     | 0.8679                      | 0.0534 | 0.7817  | 0.9636  | 0.0079 | 0.0000 | 0.4378 | 3139 | 603    | 0.1676   |
| MM      | 1.0297                      | 0.0490 | 0.9354  | 1.1335  | 0.5504 | 0.0000 | 0.3604 | 3139 | 603    | 0.9819   |
| TA2FS0  | 0.9947                      | 0.0578 | 0.8883  | 1.1140  | 0.9271 | 0.2309 | 0.2542 | 3139 | 603    | 0.9819   |



**Supplementary Table 9. Meta analysed associations between derived glycan traits and nephropathy in type 2 diabetes in the full model. Glycan values are centered and scaled. The *p*-values after FDR correction that are significant ( $\leq 0.05$ ) are highlighted in green. Red represents a positive association and blue a negative association. Full model: age, sex, the interaction thereof, BMI, HDL, non-HDL, duration of diabetes, eGFR and HbA1c.**

| glycome | Incident (Cox) |        |         |         |        |        |        |      |        |          |
|---------|----------------|--------|---------|---------|--------|--------|--------|------|--------|----------|
|         | HR             | SE     | CIlower | CIupper | pval   | I2     | I2pval | n    | nevent | pval.FDR |
| A2E     | 0.9973         | 0.0521 | 0.9005  | 1.1044  | 0.9580 | 0.0000 | 0.9264 | 2486 | 402    | 0.9946   |
| A2E0F   | 0.9746         | 0.0823 | 0.8294  | 1.1451  | 0.7541 | 0.5768 | 0.1242 | 2486 | 402    | 0.9946   |
| A2EF    | 1.0087         | 0.0533 | 0.9087  | 1.1196  | 0.8713 | 0.0000 | 0.4414 | 2486 | 402    | 0.9946   |
| A2F     | 0.9833         | 0.0531 | 0.8862  | 1.0912  | 0.7515 | 0.0000 | 0.4795 | 2486 | 402    | 0.9946   |
| A2F0G   | 0.9712         | 0.0553 | 0.8715  | 1.0823  | 0.5969 | 0.1213 | 0.2861 | 2486 | 402    | 0.9946   |
| A2F0GE  | 0.9200         | 0.0526 | 0.8299  | 1.0198  | 0.1126 | 0.0000 | 0.6441 | 2486 | 402    | 0.7424   |
| A2F0GL  | 0.9994         | 0.0532 | 0.9005  | 1.1092  | 0.9912 | 0.0000 | 0.8378 | 2486 | 402    | 0.9946   |
| A2F0GS  | 0.8999         | 0.0507 | 0.8148  | 0.9940  | 0.0376 | 0.0000 | 0.3851 | 2486 | 402    | 0.4228   |
| A2F0S0B | 1.1348         | 0.0910 | 0.9494  | 1.3564  | 0.1647 | 0.6638 | 0.0846 | 2486 | 402    | 0.7424   |
| A2F0S0G | 0.9122         | 0.0619 | 0.8079  | 1.0299  | 0.1377 | 0.2715 | 0.2413 | 2486 | 402    | 0.7424   |
| A2F0SB  | 1.0142         | 0.0517 | 0.9165  | 1.1224  | 0.7851 | 0.0000 | 0.5708 | 2486 | 402    | 0.9946   |
| A2FG    | 0.9650         | 0.0526 | 0.8704  | 1.0697  | 0.4977 | 0.0000 | 0.5860 | 2486 | 402    | 0.9946   |
| A2FGE   | 1.0848         | 0.0519 | 0.9798  | 1.2011  | 0.1170 | 0.0000 | 0.7845 | 2486 | 402    | 0.7424   |
| A2FGL   | 1.0290         | 0.0550 | 0.9239  | 1.1460  | 0.6029 | 0.0244 | 0.3113 | 2486 | 402    | 0.9946   |
| A2FGS   | 1.1083         | 0.0520 | 1.0009  | 1.2273  | 0.0480 | 0.0000 | 0.7576 | 2486 | 402    | 0.4324   |
| A2FS0B  | 1.0795         | 0.0551 | 0.9690  | 1.2026  | 0.1650 | 0.0328 | 0.3092 | 2486 | 402    | 0.7424   |
| A2FS0G  | 0.8588         | 0.0582 | 0.7663  | 0.9625  | 0.0088 | 0.0000 | 0.4380 | 2486 | 402    | 0.3979   |
| A2FSB   | 1.0684         | 0.0522 | 0.9644  | 1.1835  | 0.2053 | 0.0000 | 0.4410 | 2486 | 402    | 0.8398   |
| A2FSG   | 1.0073         | 0.0673 | 0.8827  | 1.1494  | 0.9140 | 0.3662 | 0.2091 | 2486 | 402    | 0.9946   |
| A2GS    | 0.9996         | 0.0523 | 0.9023  | 1.1075  | 0.9946 | 0.0000 | 0.7212 | 2486 | 402    | 0.9946   |
| A2L     | 1.0071         | 0.0536 | 0.9067  | 1.1187  | 0.8944 | 0.0000 | 0.9561 | 2486 | 402    | 0.9946   |
| A2LOF   | 0.9864         | 0.0532 | 0.8888  | 1.0948  | 0.7988 | 0.0000 | 0.4960 | 2486 | 402    | 0.9946   |
| A2LF    | 0.9767         | 0.0533 | 0.8798  | 1.0842  | 0.6577 | 0.0000 | 0.7150 | 2486 | 402    | 0.9946   |
| A2S0F   | 1.0074         | 0.0607 | 0.8945  | 1.1346  | 0.9026 | 0.2877 | 0.2361 | 2486 | 402    | 0.9946   |
| A2SG    | 0.9693         | 0.0540 | 0.8720  | 1.0775  | 0.5637 | 0.0000 | 0.3373 | 2486 | 402    | 0.9946   |
| A3E     | 0.9610         | 0.0564 | 0.8605  | 1.0733  | 0.4804 | 0.0000 | 0.4319 | 2486 | 402    | 0.9946   |
| A3F     | 0.9746         | 0.0544 | 0.8761  | 1.0843  | 0.6368 | 0.0000 | 0.7632 | 2486 | 402    | 0.9946   |
| A3L     | 0.9448         | 0.0698 | 0.8240  | 1.0833  | 0.4157 | 0.3894 | 0.2006 | 2486 | 402    | 0.9946   |
| A3LOF   | 0.9970         | 0.0549 | 0.8953  | 1.1102  | 0.9560 | 0.0000 | 0.4844 | 2486 | 402    | 0.9946   |
| A3LF    | 0.9803         | 0.0539 | 0.8821  | 1.0895  | 0.7121 | 0.0000 | 0.9131 | 2486 | 402    | 0.9946   |
| A3S     | 0.8986         | 0.0496 | 0.8154  | 0.9904  | 0.0312 | 0.0000 | 0.4249 | 2486 | 402    | 0.4228   |
| A4E     | 1.0334         | 0.0527 | 0.9319  | 1.1459  | 0.5334 | 0.0000 | 0.7256 | 2486 | 402    | 0.9946   |
| A4F     | 0.9751         | 0.0542 | 0.8767  | 1.0845  | 0.6418 | 0.0000 | 0.4491 | 2486 | 402    | 0.9946   |
| A4F0GE  | 1.0607         | 0.0521 | 0.9577  | 1.1749  | 0.2582 | 0.0000 | 0.4859 | 2486 | 402    | 0.8938   |
| A4F0GL  | 0.9606         | 0.0536 | 0.8647  | 1.0671  | 0.4534 | 0.0000 | 0.3822 | 2486 | 402    | 0.9946   |
| A4FGE   | 0.9809         | 0.0634 | 0.8663  | 1.1107  | 0.7611 | 0.2895 | 0.2355 | 2486 | 402    | 0.9946   |
| A4FGL   | 1.0648         | 0.0545 | 0.9569  | 1.1848  | 0.2495 | 0.0000 | 0.8624 | 2486 | 402    | 0.8938   |
| A4FGS   | 1.0727         | 0.0798 | 0.9174  | 1.2544  | 0.3792 | 0.5296 | 0.1448 | 2486 | 402    | 0.9946   |
| A4L     | 0.9854         | 0.0613 | 0.8739  | 1.1113  | 0.8109 | 0.1904 | 0.2664 | 2486 | 402    | 0.9946   |
| A4S     | 1.0171         | 0.0876 | 0.8566  | 1.2076  | 0.8469 | 0.6233 | 0.1032 | 2486 | 402    | 0.9946   |
| CA2     | 1.0414         | 0.0542 | 0.9365  | 1.1581  | 0.4539 | 0.0000 | 0.3631 | 2486 | 402    | 0.9946   |
| CA3     | 0.9405         | 0.0589 | 0.8380  | 1.0556  | 0.2979 | 0.1414 | 0.2805 | 2486 | 402    | 0.9574   |
| MHy     | 0.8779         | 0.0554 | 0.7877  | 0.9786  | 0.0187 | 0.0000 | 0.4687 | 2486 | 402    | 0.4208   |
| MM      | 1.0043         | 0.0504 | 0.9099  | 1.1086  | 0.9314 | 0.0000 | 0.7145 | 2486 | 402    | 0.9946   |
| TA2FS0  | 0.9585         | 0.0540 | 0.8622  | 1.0656  | 0.4326 | 0.0000 | 0.5959 | 2486 | 402    | 0.9946   |

**Supplementary Table 10. Meta analysed associations between derived glycan traits and retinopathy in type 2 diabetes in the basic model. Glycan values are centered and scaled. The *p*-values after FDR correction that are significant ( $\leq 0.05$ ) are highlighted in green. Red represents a positive association and blue a negative association. Basic model: age, sex and the interaction thereof.**

| Prevalent (cross-sectional) |        |        |                     |                     |        |                |                     |      |        |          |
|-----------------------------|--------|--------|---------------------|---------------------|--------|----------------|---------------------|------|--------|----------|
| glycome                     | OR     | SE     | CI <sub>lower</sub> | CI <sub>upper</sub> | pval   | I <sup>2</sup> | I <sup>2</sup> pval | n    | nevent | pval.FDR |
| A2E                         | 0.9297 | 0.0479 | 0.8464              | 1.0212              | 0.1281 | 0.0000         | 0.7989              | 3217 | 505    | 0.4794   |
| A2E0F                       | 0.9484 | 0.0491 | 0.8614              | 1.0441              | 0.2799 | 0.0000         | 0.7490              | 3217 | 505    | 0.5432   |
| A2EF                        | 1.0741 | 0.0597 | 0.9555              | 1.2074              | 0.2310 | 0.3359         | 0.2198              | 3217 | 505    | 0.5198   |
| A2F                         | 1.0658 | 0.0481 | 0.9699              | 1.1712              | 0.1851 | 0.0000         | 0.4503              | 3217 | 505    | 0.4794   |
| A2F0G                       | 0.9210 | 0.0818 | 0.7846              | 1.0812              | 0.3145 | 0.6525         | 0.0898              | 3217 | 505    | 0.5662   |
| A2F0GE                      | 0.8682 | 0.0492 | 0.7884              | 0.9561              | 0.0041 | 0.0000         | 0.3525              | 3217 | 505    | 0.0917   |
| A2F0GL                      | 1.0423 | 0.0492 | 0.9466              | 1.1478              | 0.3990 | 0.0000         | 0.7585              | 3217 | 505    | 0.6905   |
| A2F0GS                      | 0.8585 | 0.0652 | 0.7555              | 0.9756              | 0.0194 | 0.4344         | 0.1836              | 3217 | 505    | 0.2903   |
| A2F0SOB                     | 0.9943 | 0.0500 | 0.9015              | 1.0967              | 0.9092 | 0.0000         | 0.5959              | 3217 | 505    | 0.9742   |
| A2F0SOG                     | 1.0873 | 0.0503 | 0.9852              | 1.2000              | 0.0962 | 0.0000         | 0.8250              | 3217 | 505    | 0.4558   |
| A2F0SB                      | 1.0809 | 0.0552 | 0.9702              | 1.2043              | 0.1583 | 0.2517         | 0.2477              | 3217 | 505    | 0.4794   |
| A2FG                        | 1.0112 | 0.0509 | 0.9153              | 1.1172              | 0.8260 | 0.0000         | 0.3632              | 3217 | 505    | 0.9530   |
| A2FGE                       | 1.0841 | 0.0497 | 0.9835              | 1.1949              | 0.1041 | 0.0000         | 0.4697              | 3217 | 505    | 0.4558   |
| A2FGL                       | 0.9997 | 0.0499 | 0.9065              | 1.1025              | 0.9949 | 0.0000         | 0.7366              | 3217 | 505    | 0.9997   |
| A2FGS                       | 1.0852 | 0.0499 | 0.9840              | 1.1968              | 0.1017 | 0.0000         | 0.6134              | 3217 | 505    | 0.4558   |
| A2FS0B                      | 1.0275 | 0.0509 | 0.9299              | 1.1352              | 0.5943 | 0.0000         | 0.9443              | 3217 | 505    | 0.9209   |
| A2FS0G                      | 0.9424 | 0.0553 | 0.8456              | 1.0503              | 0.2834 | 0.0000         | 0.6726              | 3217 | 505    | 0.5432   |
| A2FSB                       | 1.0059 | 0.0497 | 0.9126              | 1.1088              | 0.9056 | 0.0000         | 0.7342              | 3217 | 505    | 0.9742   |
| A2FSG                       | 1.0233 | 0.0501 | 0.9276              | 1.1288              | 0.6458 | 0.0000         | 0.8693              | 3217 | 505    | 0.9209   |
| A2GS                        | 0.9409 | 0.0481 | 0.8562              | 1.0339              | 0.2053 | 0.0000         | 0.6727              | 3217 | 505    | 0.4862   |
| A2L                         | 1.0667 | 0.0488 | 0.9693              | 1.1738              | 0.1862 | 0.0000         | 0.7050              | 3217 | 505    | 0.4794   |
| A2L0F                       | 1.0558 | 0.0482 | 0.9607              | 1.1604              | 0.2597 | 0.0000         | 0.4882              | 3217 | 505    | 0.5432   |
| A2LF                        | 1.0884 | 0.0514 | 0.9841              | 1.2037              | 0.0992 | 0.0469         | 0.3057              | 3217 | 505    | 0.4558   |
| A2S0F                       | 0.9722 | 0.0486 | 0.8839              | 1.0693              | 0.5612 | 0.0000         | 0.9536              | 3217 | 505    | 0.9020   |
| A2SG                        | 0.9250 | 0.0737 | 0.8006              | 1.0687              | 0.2897 | 0.5825         | 0.1217              | 3217 | 505    | 0.5432   |
| A3E                         | 0.9176 | 0.0492 | 0.8332              | 1.0106              | 0.0807 | 0.0000         | 0.3895              | 3217 | 505    | 0.4558   |
| A3F                         | 1.1044 | 0.0624 | 0.9773              | 1.2479              | 0.1114 | 0.3299         | 0.2219              | 3217 | 505    | 0.4558   |
| A3L                         | 0.9880 | 0.0492 | 0.8971              | 1.0880              | 0.8058 | 0.0000         | 0.5659              | 3217 | 505    | 0.9530   |
| A3L0F                       | 1.1379 | 0.0958 | 0.9430              | 1.3730              | 0.1778 | 0.7245         | 0.0567              | 3217 | 505    | 0.4794   |
| A3LF                        | 1.0969 | 0.0626 | 0.9703              | 1.2402              | 0.1394 | 0.3388         | 0.2188              | 3217 | 505    | 0.4794   |
| A3S                         | 0.8977 | 0.0827 | 0.7633              | 1.0556              | 0.1917 | 0.6474         | 0.0922              | 3217 | 505    | 0.4794   |
| A4E                         | 1.0167 | 0.0493 | 0.9230              | 1.1198              | 0.7374 | 0.0000         | 0.9991              | 3217 | 505    | 0.9217   |
| A4F                         | 1.1197 | 0.0507 | 1.0137              | 1.2367              | 0.0259 | 0.0000         | 0.3631              | 3217 | 505    | 0.2910   |
| A4F0GE                      | 1.0347 | 0.0490 | 0.9399              | 1.1390              | 0.4868 | 0.0000         | 0.3900              | 3217 | 505    | 0.8114   |
| A4F0GL                      | 0.9787 | 0.0489 | 0.8893              | 1.0770              | 0.6592 | 0.0000         | 0.3838              | 3217 | 505    | 0.9209   |
| A4FGE                       | 0.9840 | 0.0678 | 0.8617              | 1.1238              | 0.8121 | 0.4642         | 0.1719              | 3217 | 505    | 0.9530   |
| A4FGL                       | 1.0240 | 0.0567 | 0.9163              | 1.1444              | 0.6753 | 0.2408         | 0.2511              | 3217 | 505    | 0.9209   |
| A4FGS                       | 0.9998 | 0.0498 | 0.9069              | 1.1023              | 0.9972 | 0.0000         | 0.9860              | 3217 | 505    | 0.9997   |
| A4L                         | 1.0000 | 0.0492 | 0.9082              | 1.1012              | 0.9997 | 0.0000         | 0.8976              | 3217 | 505    | 0.9997   |
| A4S                         | 1.0183 | 0.0493 | 0.9246              | 1.1216              | 0.7121 | 0.0000         | 0.8831              | 3217 | 505    | 0.9217   |
| CA2                         | 1.0231 | 0.0512 | 0.9253              | 1.1312              | 0.6560 | 0.0000         | 0.3275              | 3217 | 505    | 0.9209   |
| CA3                         | 0.9757 | 0.0707 | 0.8495              | 1.1208              | 0.7281 | 0.4675         | 0.1706              | 3217 | 505    | 0.9217   |
| MHy                         | 0.7902 | 0.0718 | 0.6865              | 0.9096              | 0.0010 | 0.4033         | 0.1955              | 3217 | 505    | 0.0468   |
| MM                          | 0.9049 | 0.0488 | 0.8223              | 0.9958              | 0.0407 | 0.0000         | 0.6591              | 3217 | 505    | 0.3663   |
| TA2FS0                      | 1.0073 | 0.0482 | 0.9165              | 1.1070              | 0.8802 | 0.0000         | 0.9420              | 3217 | 505    | 0.9742   |

**Supplementary Table 10. Meta analysed associations between derived glycan traits and retinopathy in type 2 diabetes in the basic model. Glycan values are centered and scaled. The *p*-values after FDR correction that are significant ( $\leq 0.05$ ) are highlighted in green. Red represents a positive association and blue a negative association. Basic model: age, sex and the interaction thereof.**

| glycome | Incident (Cox) |        |         |         |        |        | n      | nevent | pval.FDR |        |
|---------|----------------|--------|---------|---------|--------|--------|--------|--------|----------|--------|
|         | HR             | SE     | CIlower | CIupper | pval   | I2     |        |        |          | I2pval |
| A2E     | 0.9376         | 0.0550 | 0.8417  | 1.0444  | 0.2416 | 0.0000 | 0.8196 | 2639   | 345      | 0.3884 |
| A2E0F   | 1.0242         | 0.0928 | 0.8538  | 1.2285  | 0.7971 | 0.6017 | 0.1131 | 2639   | 345      | 0.8540 |
| A2EF    | 1.0841         | 0.0801 | 0.9267  | 1.2683  | 0.3131 | 0.5566 | 0.1332 | 2639   | 345      | 0.4403 |
| A2F     | 1.1029         | 0.0642 | 0.9724  | 1.2509  | 0.1273 | 0.2668 | 0.2429 | 2639   | 345      | 0.3370 |
| A2F0G   | 0.8960         | 0.0867 | 0.7560  | 1.0619  | 0.2053 | 0.5888 | 0.1189 | 2639   | 345      | 0.3851 |
| A2F0GE  | 0.9898         | 0.0563 | 0.8864  | 1.1051  | 0.8547 | 0.0448 | 0.3062 | 2639   | 345      | 0.8741 |
| A2F0GL  | 0.9557         | 0.0559 | 0.8565  | 1.0665  | 0.4181 | 0.0000 | 0.7643 | 2639   | 345      | 0.5534 |
| A2F0GS  | 0.9710         | 0.0749 | 0.8384  | 1.1246  | 0.6941 | 0.4443 | 0.1798 | 2639   | 345      | 0.8220 |
| A2F0SOB | 1.1013         | 0.0549 | 0.9890  | 1.2265  | 0.0787 | 0.0000 | 0.8362 | 2639   | 345      | 0.3370 |
| A2F0S0G | 0.8816         | 0.0539 | 0.7931  | 0.9799  | 0.0195 | 0.0000 | 0.6203 | 2639   | 345      | 0.2922 |
| A2F0SB  | 1.1576         | 0.0522 | 1.0451  | 1.2823  | 0.0050 | 0.0000 | 0.3550 | 2639   | 345      | 0.2266 |
| A2FG    | 0.9397         | 0.0561 | 0.8418  | 1.0490  | 0.2677 | 0.0000 | 0.6005 | 2639   | 345      | 0.4153 |
| A2FGE   | 1.0883         | 0.1004 | 0.8939  | 1.3249  | 0.3995 | 0.6830 | 0.0757 | 2639   | 345      | 0.5448 |
| A2FGL   | 0.9822         | 0.0661 | 0.8629  | 1.1181  | 0.7864 | 0.2487 | 0.2486 | 2639   | 345      | 0.8540 |
| A2FGS   | 1.0867         | 0.0690 | 0.9493  | 1.2440  | 0.2279 | 0.3212 | 0.2248 | 2639   | 345      | 0.3851 |
| A2FS0B  | 1.0574         | 0.0550 | 0.9493  | 1.1779  | 0.3104 | 0.0000 | 0.8565 | 2639   | 345      | 0.4403 |
| A2FS0G  | 0.8660         | 0.1202 | 0.6843  | 1.0959  | 0.2310 | 0.7138 | 0.0616 | 2639   | 345      | 0.3851 |
| A2FSB   | 1.0236         | 0.0551 | 0.9188  | 1.1402  | 0.6723 | 0.0000 | 0.9519 | 2639   | 345      | 0.8177 |
| A2FSG   | 0.9882         | 0.0559 | 0.8857  | 1.1026  | 0.8319 | 0.0000 | 0.9058 | 2639   | 345      | 0.8706 |
| A2GS    | 0.9748         | 0.0549 | 0.8754  | 1.0856  | 0.6425 | 0.0000 | 0.3615 | 2639   | 345      | 0.8032 |
| A2L     | 0.9597         | 0.0560 | 0.8599  | 1.0710  | 0.4620 | 0.0000 | 0.9809 | 2639   | 345      | 0.5940 |
| A2L0F   | 1.0964         | 0.0673 | 0.9610  | 1.2510  | 0.1713 | 0.3368 | 0.2195 | 2639   | 345      | 0.3846 |
| A2LF    | 1.1033         | 0.0575 | 0.9857  | 1.2351  | 0.0874 | 0.0000 | 0.9693 | 2639   | 345      | 0.3370 |
| A2S0F   | 1.0064         | 0.0899 | 0.8438  | 1.2003  | 0.9438 | 0.5930 | 0.1170 | 2639   | 345      | 0.9438 |
| A2SG    | 0.9035         | 0.0503 | 0.8187  | 0.9971  | 0.0437 | 0.0000 | 0.9930 | 2639   | 345      | 0.3370 |
| A3E     | 1.0735         | 0.0539 | 0.9659  | 1.1930  | 0.1880 | 0.0000 | 0.3649 | 2639   | 345      | 0.3846 |
| A3F     | 1.0921         | 0.0572 | 0.9763  | 1.2217  | 0.1235 | 0.0000 | 0.3482 | 2639   | 345      | 0.3370 |
| A3L     | 0.9014         | 0.0545 | 0.8102  | 1.0030  | 0.0568 | 0.0000 | 0.9659 | 2639   | 345      | 0.3370 |
| A3L0F   | 1.0864         | 0.0571 | 0.9713  | 1.2152  | 0.1468 | 0.0000 | 0.8776 | 2639   | 345      | 0.3670 |
| A3LF    | 1.1036         | 0.0589 | 0.9834  | 1.2386  | 0.0939 | 0.0650 | 0.3011 | 2639   | 345      | 0.3370 |
| A3S     | 0.9187         | 0.0674 | 0.8051  | 1.0484  | 0.2083 | 0.3557 | 0.2128 | 2639   | 345      | 0.3851 |
| A4E     | 1.1064         | 0.0547 | 0.9939  | 1.2316  | 0.0647 | 0.0000 | 0.8169 | 2639   | 345      | 0.3370 |
| A4F     | 1.0973         | 0.0609 | 0.9739  | 1.2363  | 0.1273 | 0.0985 | 0.2923 | 2639   | 345      | 0.3370 |
| A4F0GE  | 1.1030         | 0.0549 | 0.9905  | 1.2283  | 0.0740 | 0.0000 | 0.7876 | 2639   | 345      | 0.3370 |
| A4F0GL  | 0.9142         | 0.0548 | 0.8210  | 1.0179  | 0.1018 | 0.0000 | 0.9293 | 2639   | 345      | 0.3370 |
| A4FGE   | 1.0867         | 0.0533 | 0.9789  | 1.2064  | 0.1187 | 0.0000 | 0.8300 | 2639   | 345      | 0.3370 |
| A4FGL   | 0.9293         | 0.0547 | 0.8347  | 1.0345  | 0.1800 | 0.0000 | 0.6561 | 2639   | 345      | 0.3846 |
| A4FGS   | 0.9747         | 0.0792 | 0.8346  | 1.1383  | 0.7460 | 0.4773 | 0.1666 | 2639   | 345      | 0.8540 |
| A4L     | 0.9125         | 0.0554 | 0.8185  | 1.0172  | 0.0985 | 0.0000 | 0.9275 | 2639   | 345      | 0.3370 |
| A4S     | 0.9852         | 0.0555 | 0.8837  | 1.0984  | 0.7884 | 0.0000 | 0.6244 | 2639   | 345      | 0.8540 |
| CA2     | 1.0718         | 0.0577 | 0.9572  | 1.2001  | 0.2295 | 0.0000 | 0.4751 | 2639   | 345      | 0.3851 |
| CA3     | 0.9214         | 0.0578 | 0.8227  | 1.0318  | 0.1564 | 0.0000 | 0.5667 | 2639   | 345      | 0.3703 |
| MHy     | 0.8179         | 0.0812 | 0.6976  | 0.9590  | 0.0133 | 0.4338 | 0.1838 | 2639   | 345      | 0.2922 |
| MM      | 0.9439         | 0.0549 | 0.8477  | 1.0510  | 0.2925 | 0.0000 | 0.9701 | 2639   | 345      | 0.4388 |
| TA2FS0  | 1.1037         | 0.0544 | 0.9920  | 1.2280  | 0.0698 | 0.0000 | 0.8238 | 2639   | 345      | 0.3370 |

**Supplementary Table 11. Meta analysed associations between derived glycan traits and retinopathy in type 2 diabetes in the full model. Glycan values are centered and scaled. The *p*-values after FDR correction that are significant ( $\leq 0.05$ ) are highlighted in green. Red represents a positive association and blue a negative association. Full model: age, sex, the interaction thereof, BMI, HDL, non-HDL, duration of diabetes, eGFR and HbA1c.**

| glycome | Prevalent (cross-sectional) |        |                     |                     |        |        |        |      |        |          |
|---------|-----------------------------|--------|---------------------|---------------------|--------|--------|--------|------|--------|----------|
|         | OR                          | SE     | CI <sub>lower</sub> | CI <sub>upper</sub> | pval   | I2     | I2pval | n    | nevent | pval.FDR |
| A2E     | 0.9302                      | 0.0525 | 0.8394              | 1.0310              | 0.1680 | 0.0000 | 0.7128 | 3217 | 505    | 0.7789   |
| A2E0F   | 0.9831                      | 0.0541 | 0.8842              | 1.0930              | 0.7521 | 0.0000 | 0.8989 | 3217 | 505    | 0.8461   |
| A2EF    | 1.0539                      | 0.0683 | 0.9218              | 1.2049              | 0.4421 | 0.3956 | 0.1983 | 3217 | 505    | 0.7789   |
| A2F     | 1.0620                      | 0.0522 | 0.9586              | 1.1764              | 0.2497 | 0.0000 | 0.3984 | 3217 | 505    | 0.7789   |
| A2F0G   | 0.9290                      | 0.0818 | 0.7914              | 1.0905              | 0.3677 | 0.6031 | 0.1125 | 3217 | 505    | 0.7789   |
| A2F0GE  | 0.8988                      | 0.0545 | 0.8078              | 1.0000              | 0.0501 | 0.0000 | 0.4366 | 3217 | 505    | 0.7789   |
| A2F0GL  | 1.0315                      | 0.0545 | 0.9269              | 1.1478              | 0.5700 | 0.0000 | 0.6011 | 3217 | 505    | 0.7843   |
| A2F0GS  | 0.8838                      | 0.0700 | 0.7705              | 1.0137              | 0.0774 | 0.3987 | 0.1972 | 3217 | 505    | 0.7789   |
| A2F0SOB | 0.9810                      | 0.0540 | 0.8825              | 1.0906              | 0.7232 | 0.0000 | 0.9748 | 3217 | 505    | 0.8345   |
| A2F0S0G | 1.0795                      | 0.0548 | 0.9696              | 1.2018              | 0.1627 | 0.0000 | 0.7094 | 3217 | 505    | 0.7789   |
| A2F0SB  | 1.0494                      | 0.0639 | 0.9259              | 1.1894              | 0.4500 | 0.3567 | 0.2125 | 3217 | 505    | 0.7789   |
| A2FG    | 0.9694                      | 0.0546 | 0.8710              | 1.0789              | 0.5687 | 0.0000 | 0.4771 | 3217 | 505    | 0.7843   |
| A2FGE   | 1.0529                      | 0.0555 | 0.9445              | 1.1738              | 0.3526 | 0.0000 | 0.6443 | 3217 | 505    | 0.7789   |
| A2FGL   | 0.9634                      | 0.0568 | 0.8619              | 1.0769              | 0.5115 | 0.0000 | 0.4428 | 3217 | 505    | 0.7843   |
| A2FGS   | 1.0345                      | 0.0551 | 0.9286              | 1.1524              | 0.5380 | 0.0000 | 0.9830 | 3217 | 505    | 0.7843   |
| A2FS0B  | 1.0037                      | 0.0574 | 0.8969              | 1.1233              | 0.9486 | 0.0000 | 0.9514 | 3217 | 505    | 0.9702   |
| A2FS0G  | 0.9300                      | 0.0610 | 0.8252              | 1.0481              | 0.2341 | 0.0000 | 0.6695 | 3217 | 505    | 0.7789   |
| A2FSB   | 1.0619                      | 0.0540 | 0.9553              | 1.1803              | 0.2660 | 0.0000 | 0.3614 | 3217 | 505    | 0.7789   |
| A2FSG   | 0.9746                      | 0.0548 | 0.8754              | 1.0850              | 0.6385 | 0.0000 | 0.4265 | 3217 | 505    | 0.7962   |
| A2GS    | 0.9392                      | 0.0532 | 0.8463              | 1.0424              | 0.2383 | 0.0000 | 0.4736 | 3217 | 505    | 0.7789   |
| A2L     | 1.0347                      | 0.0552 | 0.9286              | 1.1529              | 0.5364 | 0.0000 | 0.4396 | 3217 | 505    | 0.7843   |
| A2L0F   | 1.0587                      | 0.0525 | 0.9552              | 1.1734              | 0.2771 | 0.0000 | 0.3940 | 3217 | 505    | 0.7789   |
| A2LF    | 1.0447                      | 0.0551 | 0.9377              | 1.1639              | 0.4278 | 0.0000 | 0.4791 | 3217 | 505    | 0.7789   |
| A2S0F   | 0.9896                      | 0.0542 | 0.8899              | 1.1005              | 0.8472 | 0.0000 | 0.8362 | 3217 | 505    | 0.9077   |
| A2SG    | 0.9191                      | 0.0963 | 0.7609              | 1.1101              | 0.3811 | 0.7079 | 0.0643 | 3217 | 505    | 0.7789   |
| A3E     | 0.9098                      | 0.0643 | 0.8021              | 1.0319              | 0.1412 | 0.2111 | 0.2602 | 3217 | 505    | 0.7789   |
| A3F     | 1.0545                      | 0.0558 | 0.9453              | 1.1764              | 0.3413 | 0.0000 | 0.5354 | 3217 | 505    | 0.7789   |
| A3L     | 1.0012                      | 0.0560 | 0.8971              | 1.1174              | 0.9828 | 0.0000 | 0.5164 | 3217 | 505    | 0.9828   |
| A3L0F   | 1.0975                      | 0.0836 | 0.9316              | 1.2930              | 0.2659 | 0.5760 | 0.1246 | 3217 | 505    | 0.7789   |
| A3LF    | 1.0479                      | 0.0559 | 0.9392              | 1.1692              | 0.4022 | 0.0000 | 0.5170 | 3217 | 505    | 0.7789   |
| A3S     | 0.9120                      | 0.1092 | 0.7363              | 1.1296              | 0.3987 | 0.7608 | 0.0409 | 3217 | 505    | 0.7789   |
| A4E     | 1.0224                      | 0.0554 | 0.9172              | 1.1397              | 0.6896 | 0.0000 | 0.8578 | 3217 | 505    | 0.8166   |
| A4F     | 1.0723                      | 0.0560 | 0.9609              | 1.1967              | 0.2122 | 0.0000 | 0.7726 | 3217 | 505    | 0.7789   |
| A4F0GE  | 1.0312                      | 0.0548 | 0.9262              | 1.1480              | 0.5751 | 0.0000 | 0.6651 | 3217 | 505    | 0.7843   |
| A4F0GL  | 1.0078                      | 0.0552 | 0.9045              | 1.1230              | 0.8879 | 0.0000 | 0.6366 | 3217 | 505    | 0.9291   |
| A4FGE   | 0.9834                      | 0.0629 | 0.8693              | 1.1125              | 0.7902 | 0.2319 | 0.2539 | 3217 | 505    | 0.8673   |
| A4FGL   | 1.0540                      | 0.0660 | 0.9261              | 1.1997              | 0.4256 | 0.3054 | 0.2302 | 3217 | 505    | 0.7789   |
| A4FGS   | 1.0617                      | 0.0542 | 0.9547              | 1.1807              | 0.2694 | 0.0000 | 0.6817 | 3217 | 505    | 0.7789   |
| A4L     | 1.0267                      | 0.0557 | 0.9205              | 1.1452              | 0.6365 | 0.0000 | 0.8876 | 3217 | 505    | 0.7962   |
| A4S     | 1.0861                      | 0.0541 | 0.9768              | 1.2076              | 0.1269 | 0.0000 | 0.8530 | 3217 | 505    | 0.7789   |
| CA2     | 1.0532                      | 0.1132 | 0.8436              | 1.3148              | 0.6470 | 0.7544 | 0.0436 | 3217 | 505    | 0.7962   |
| CA3     | 0.9426                      | 0.1322 | 0.7274              | 1.2214              | 0.6547 | 0.8182 | 0.0190 | 3217 | 505    | 0.7962   |
| MHy     | 0.8858                      | 0.0750 | 0.7647              | 1.0260              | 0.1058 | 0.3736 | 0.2064 | 3217 | 505    | 0.7789   |
| MM      | 0.9292                      | 0.0532 | 0.8373              | 1.0313              | 0.1674 | 0.0000 | 0.9812 | 3217 | 505    | 0.7789   |
| TA2FS0  | 1.0306                      | 0.0518 | 0.9311              | 1.1408              | 0.5607 | 0.0000 | 0.8646 | 3217 | 505    | 0.7843   |

**Supplementary Table 11. Meta analysed associations between derived glycan traits and retinopathy in type 2 diabetes in the full model. Glycan values are centered and scaled. The *p*-values after FDR correction that are significant ( $\leq 0.05$ ) are highlighted in green. Red represents a positive association and blue a negative association. Full model: age, sex, the interaction thereof, BMI, HDL, non-HDL, duration of diabetes, eGFR and HbA1c.**

| glycome | Incident (Cox) |        |                     |                     |        |        |        |      |        |          |
|---------|----------------|--------|---------------------|---------------------|--------|--------|--------|------|--------|----------|
|         | HR             | SE     | CI <sub>lower</sub> | CI <sub>upper</sub> | pval   | I2     | I2pval | n    | nevent | pval.FDR |
| A2E     | 0.9114         | 0.0550 | 0.8182              | 1.0152              | 0.0919 | 0.0000 | 0.7479 | 2639 | 345    | 0.6181   |
| A2E0F   | 1.0434         | 0.0775 | 0.8963              | 1.2147              | 0.5836 | 0.4134 | 0.1917 | 2639 | 345    | 0.9043   |
| A2EF    | 1.0412         | 0.0791 | 0.8916              | 1.2159              | 0.6097 | 0.4844 | 0.1637 | 2639 | 345    | 0.9043   |
| A2F     | 1.0776         | 0.0558 | 0.9660              | 1.2022              | 0.1801 | 0.0000 | 0.3221 | 2639 | 345    | 0.6539   |
| A2F0G   | 0.9082         | 0.1062 | 0.7375              | 1.1184              | 0.3648 | 0.7241 | 0.0569 | 2639 | 345    | 0.7461   |
| A2F0GE  | 0.9666         | 0.0565 | 0.8652              | 1.0798              | 0.5478 | 0.0100 | 0.3149 | 2639 | 345    | 0.9043   |
| A2F0GL  | 1.0080         | 0.0563 | 0.9027              | 1.1255              | 0.8880 | 0.0000 | 0.5391 | 2639 | 345    | 0.9747   |
| A2F0GS  | 0.9664         | 0.0839 | 0.8199              | 1.1390              | 0.6832 | 0.5107 | 0.1528 | 2639 | 345    | 0.9043   |
| A2F0SOB | 1.0458         | 0.0546 | 0.9395              | 1.1640              | 0.4129 | 0.0000 | 0.7791 | 2639 | 345    | 0.7833   |
| A2F0S0G | 0.9202         | 0.0537 | 0.8283              | 1.0223              | 0.1213 | 0.0000 | 0.6996 | 2639 | 345    | 0.6181   |
| A2F0SB  | 1.1201         | 0.0552 | 1.0052              | 1.2481              | 0.0400 | 0.0000 | 0.3668 | 2639 | 345    | 0.3600   |
| A2FG    | 0.9147         | 0.0562 | 0.8193              | 1.0213              | 0.1128 | 0.0000 | 0.8626 | 2639 | 345    | 0.6181   |
| A2FGE   | 0.9971         | 0.0983 | 0.8224              | 1.2089              | 0.9761 | 0.6341 | 0.0983 | 2639 | 345    | 0.9761   |
| A2FGL   | 0.9952         | 0.0589 | 0.8867              | 1.1168              | 0.9343 | 0.0000 | 0.6504 | 2639 | 345    | 0.9761   |
| A2FGS   | 1.0036         | 0.0786 | 0.8603              | 1.1707              | 0.9639 | 0.4304 | 0.1852 | 2639 | 345    | 0.9761   |
| A2FS0B  | 1.0304         | 0.0592 | 0.9175              | 1.1571              | 0.6133 | 0.0000 | 0.7577 | 2639 | 345    | 0.9043   |
| A2FS0G  | 0.9049         | 0.1016 | 0.7415              | 1.1044              | 0.3256 | 0.5766 | 0.1244 | 2639 | 345    | 0.7326   |
| A2FSB   | 1.0462         | 0.0557 | 0.9379              | 1.1669              | 0.4178 | 0.0000 | 0.8300 | 2639 | 345    | 0.7833   |
| A2FSG   | 0.9379         | 0.0580 | 0.8372              | 1.0508              | 0.2692 | 0.0000 | 0.7685 | 2639 | 345    | 0.6880   |
| A2GS    | 0.9440         | 0.0622 | 0.8356              | 1.0665              | 0.3548 | 0.1595 | 0.2754 | 2639 | 345    | 0.7461   |
| A2L     | 0.9947         | 0.0576 | 0.8885              | 1.1136              | 0.9267 | 0.0000 | 0.4600 | 2639 | 345    | 0.9761   |
| A2L0F   | 1.0760         | 0.0557 | 0.9646              | 1.2001              | 0.1889 | 0.0000 | 0.3439 | 2639 | 345    | 0.6539   |
| A2LF    | 1.0286         | 0.0584 | 0.9174              | 1.1532              | 0.6290 | 0.0000 | 0.8498 | 2639 | 345    | 0.9043   |
| A2S0F   | 1.0278         | 0.0828 | 0.8738              | 1.2090              | 0.7404 | 0.4908 | 0.1611 | 2639 | 345    | 0.9157   |
| A2SG    | 0.8885         | 0.0553 | 0.7972              | 0.9903              | 0.0327 | 0.0000 | 0.7624 | 2639 | 345    | 0.3600   |
| A3E     | 0.9622         | 0.0744 | 0.8317              | 1.1133              | 0.6048 | 0.3803 | 0.2040 | 2639 | 345    | 0.9043   |
| A3F     | 1.0652         | 0.0587 | 0.9494              | 1.1950              | 0.2822 | 0.0000 | 0.8101 | 2639 | 345    | 0.6880   |
| A3L     | 0.9904         | 0.0574 | 0.8849              | 1.1084              | 0.8660 | 0.0000 | 0.6294 | 2639 | 345    | 0.9742   |
| A3L0F   | 1.0881         | 0.0596 | 0.9681              | 1.2230              | 0.1566 | 0.0000 | 0.4101 | 2639 | 345    | 0.6408   |
| A3LF    | 1.0633         | 0.0581 | 0.9489              | 1.1915              | 0.2905 | 0.0000 | 0.6347 | 2639 | 345    | 0.6880   |
| A3S     | 0.9382         | 0.0558 | 0.8410              | 1.0467              | 0.2533 | 0.0000 | 0.3767 | 2639 | 345    | 0.6880   |
| A4E     | 1.0183         | 0.0576 | 0.9096              | 1.1401              | 0.7527 | 0.0000 | 0.6090 | 2639 | 345    | 0.9157   |
| A4F     | 1.0765         | 0.0587 | 0.9595              | 1.2077              | 0.2092 | 0.0000 | 0.7051 | 2639 | 345    | 0.6723   |
| A4F0GE  | 1.0142         | 0.0572 | 0.9065              | 1.1346              | 0.8058 | 0.0000 | 0.8920 | 2639 | 345    | 0.9297   |
| A4F0GL  | 1.0152         | 0.0569 | 0.9081              | 1.1349              | 0.7911 | 0.0000 | 0.8765 | 2639 | 345    | 0.9297   |
| A4FGE   | 1.0191         | 0.0600 | 0.9060              | 1.1462              | 0.7529 | 0.1292 | 0.2839 | 2639 | 345    | 0.9157   |
| A4FGL   | 1.0248         | 0.0568 | 0.9168              | 1.1455              | 0.6665 | 0.0000 | 0.7394 | 2639 | 345    | 0.9043   |
| A4FGS   | 1.0931         | 0.0578 | 0.9760              | 1.2242              | 0.1236 | 0.0000 | 0.3755 | 2639 | 345    | 0.6181   |
| A4L     | 1.0240         | 0.0578 | 0.9143              | 1.1469              | 0.6816 | 0.0000 | 0.7460 | 2639 | 345    | 0.9043   |
| A4S     | 1.0848         | 0.0572 | 0.9698              | 1.2135              | 0.1545 | 0.0000 | 0.6862 | 2639 | 345    | 0.6408   |
| CA2     | 1.1600         | 0.0610 | 1.0292              | 1.3074              | 0.0151 | 0.0000 | 0.7857 | 2639 | 345    | 0.3030   |
| CA3     | 0.8435         | 0.0611 | 0.7483              | 0.9509              | 0.0054 | 0.0000 | 0.8280 | 2639 | 345    | 0.2422   |
| MHy     | 0.9132         | 0.0749 | 0.7885              | 1.0575              | 0.2250 | 0.3251 | 0.2235 | 2639 | 345    | 0.6751   |
| MM      | 0.9715         | 0.0563 | 0.8700              | 1.0850              | 0.6083 | 0.0000 | 0.8637 | 2639 | 345    | 0.9043   |
| TA2FS0  | 1.1351         | 0.0546 | 1.0200              | 1.2632              | 0.0202 | 0.0000 | 0.9007 | 2639 | 345    | 0.3030   |
